1 **High-Throughput Analysis of Lung Immune Cells in a Murine Model of Rheumatoid**  
2 **Arthritis-Associated Lung Disease**

3

4 **Authors:** Rohit Gaurav, MSc, PhD<sup>1</sup>, Ted R. Mikuls, MD, MSPH<sup>2,3</sup>, Geoffrey M. Thiele, PhD<sup>2,3</sup>,  
5 Amy J. Nelson, MT (ASCP)<sup>1</sup>, Meng Niu, PhD<sup>5</sup>, Chittibabu Guda, PhD<sup>5</sup>, James D. Eudy, PhD<sup>5</sup>,  
6 Austin E. Barry BS<sup>1</sup>, Todd A. Wyatt, PhD<sup>2,4,6</sup>, Debra J. Romberger, MD<sup>2,4</sup>, Michael J. Duryee, MS  
7 <sup>2,3</sup>, Bryant R. England, MD, PhD<sup>2,3</sup>, Jill A. Poole, MD<sup>1</sup>

8

9 <sup>1</sup>Division of Allergy and Immunology, Department of Internal Medicine, University of Nebraska  
10 Medical Center (UNMC); <sup>2</sup>Veterans Affairs Nebraska-Western Iowa Health Care System,  
11 Research Service, Omaha, NE; <sup>3</sup>Division of Rheumatology & Immunology; <sup>4</sup>Division of  
12 Pulmonary, Critical Care & Sleep, Department of Internal Medicine, UNMC; <sup>5</sup>Department of  
13 Genetics, Cell Biology and Anatomy, UNMC; <sup>6</sup>Department of Environmental, Agricultural &  
14 Occupational Health, College of Public Health, UNMC, Omaha, Nebraska 68168, USA

15

16 Corresponding Author:

17 Rohit Gaurav, MSc, PhD, FAAAAI  
18 Division of Allergy and Immunology  
19 Department of Internal Medicine  
20 University of Nebraska Medical Center  
21 985910 Nebraska Medicine  
22 Omaha, NE 68198-5910  
23 Email: rohit.gaurav@unmc.edu

24

25 **Short title:** RNA sequencing identifies unique cell populations in RA-related lung disease

26

## 27 **Abstract**

28 Rheumatoid arthritis (RA)-associated lung disease is a leading cause of mortality in RA, yet  
29 the mechanisms linking lung disease and RA remain unknown. Using an established murine model  
30 of RA-associated lung disease combining collagen-induced arthritis (CIA) with organic dust  
31 extract (ODE)-induced airway inflammation, differences among lung immune cell populations  
32 were analyzed by single cell RNA-sequencing. Additionally, four lung myeloid-derived immune  
33 cell populations including macrophages, monocytes/macrophages, monocytes, and neutrophils  
34 were isolated by fluorescence cell sorting and gene expression was determined by NanoString  
35 analysis. Unsupervised clustering revealed 14 discrete clusters among Sham, CIA, ODE, and  
36 CIA+ODE treatment groups: 3 neutrophils (inflammatory, resident/transitional,  
37 autoreactive/suppressor), 5 macrophages (airspace, differentiating/recruited, recruited,  
38 resident/interstitial, and proliferative airspace), 2 T-cells (differentiating and effector), and a single  
39 cluster each of inflammatory monocytes, dendritic cells, B-cells and natural killer cells.  
40 Inflammatory monocytes, autoreactive/suppressor neutrophils, and recruited/differentiating  
41 macrophages were predominant with arthritis induction (CIA and CIA+ODE). By specific lung  
42 cell isolation, several interferon-related and autoimmune genes were disproportionately expressed  
43 among CIA and CIA+ODE (e.g. *Oas11*, *Oas2*, *Ifit3*, *Gbp2*, *Ifi44*, and *Zbp1*), corresponding to RA  
44 and RA-associated lung disease. Monocytic myeloid-derived suppressor cells were reduced, while  
45 complement genes (e.g. *C1s1* and *Cfb*) were uniquely increased in CIA+ODE mice across cell  
46 populations. Recruited and inflammatory macrophages/monocytes and neutrophils expressing  
47 interferon-, autoimmune-, and complement-related genes might contribute towards pro-fibrotic  
48 inflammatory lung responses following airborne biohazard exposures in setting of autoimmune  
49 arthritis and could be predictive and/or targeted to reduce disease burden.

50 **Keywords:** rheumatoid arthritis, lung disease, myeloid-derived immune cell populations, RNA

51 sequencing

52

## 53 **Introduction**

54        Several lung diseases have been associated with rheumatoid arthritis (RA), including  
55        interstitial lung disease (ILD), chronic obstructive pulmonary disease (COPD), pulmonary  
56        nodules, pleural effusions, bronchiolitis obliterans, and asthma (1-3). Affecting up to 40% or more  
57        of RA patients, RA-associated lung diseases pose a substantial burden to healthcare systems  
58        because of the increased morbidity and mortality, decreased quality of life, and tremendous  
59        healthcare costs (2, 4, 5). Evidence of RA-related autoantibodies generated in lung mucosa, even  
60        in the absence of articular manifestations of RA (6), as well as increased concentrations of serum  
61        anti-citrullinated protein antibody accompanying RA-related lung diseases (1, 4, 7), reinforces the  
62        pathogenic links between pulmonary inflammation and autoimmunity leading to the development  
63        of RA. Therapeutic option for RA-associated lung disease are limited (8), and key cellular and/or  
64        mediators predictive of the development and/or progression of RA-associated lung disease are  
65        lacking (9). Thus, studies are warranted to investigate and identify precise mechanisms  
66        underpinning these associations.

67        Exposure to environmental factors such as cigarette smoke represent shared risk factors in  
68        the development of RA and inflammatory lung diseases (3, 10). However, insight into how inhalant  
69        injury might lead to or exacerbate RA and its pulmonary manifestations, has been limited in the  
70        absence of a relevant disease model. Recently a pre-clinical animal model to provide insight into  
71        the important cellular players and decipher molecular and potential mechanistic pathways involved  
72        in RA-associated inflammatory lung disease was established (11). Specifically, the combination  
73        of the collagen-induced arthritis (CIA) model with a model of airborne biohazard exposure (e.g.  
74        organic dust extract/ODE) resulted in augmented arthritis, increased systemic autoimmunity, and  
75        promotion of pre-fibrotic inflammatory lung changes in mice (11) consistent with RA-associated

76 lung disease pathophysiology. However, the mechanisms underlying these observations are not  
77 known. Here, we hypothesized that RA-associated lung disease is associated with unique cellular  
78 phenotypes and specific novel gene expression of *in vivo* exposed lungs. Leveraging this novel  
79 murine model, single-cell RNA sequencing (scRNA-seq) and unsupervised clustering were  
80 applied to lung immune cells among Sham, CIA, ODE, and CIA+ODE treatment groups to explore  
81 exposure-related differences in cellular subsets, transcriptional profiles, and associated biologic  
82 pathways. In separate complimentary studies to confirm key scRNA-seq findings, lung myeloid-  
83 derived cells (i.e. monocytes/macrophages and granulocytes) were isolated and subjected to gene-  
84 expression analysis.

85

## 86 **Materials and methods**

### 87 **Animals**

88 Arthritis prone DBA/1J male mice between 6-8 weeks of age were purchased from Jackson  
89 Laboratory (Bar Harbor, ME, USA) and fed alfalfa-free chow *ad libitum* (Envigo Teklad,  
90 Huntingdon, Cambridgeshire, UK) as per supplier recommendations. All animal procedures were  
91 approved by the UNMC Institutional Animal Care and Use Committee (protocol #19-043-05) and  
92 were in accordance with NIH guidelines for the use of rodents.

### 93 **Organic dust extract**

94 Organic dust extract (ODE) was prepared as previously reported (12) to model airway  
95 inflammatory disease. Briefly, an aqueous extract of organic dust from swine confinement feeding  
96 facilities (microbial-enriched agriculture setting) was prepared by incubating 1 g dust in 10 ml  
97 sterile Hank's Balanced Salt Solution (Mediatech, Manassas, VA, USA) for 1 hour at room

98 temperature followed by centrifugation for 10 minutes at 2,850 x g and repeated twice. The end  
99 supernate was filter-sterilized with a 0.22 µm syringe filter to remove any microorganisms and  
100 coarse particles. Constituents of the extract have been well characterized and include both  
101 endotoxin and peptidoglycans (11, 12). ODE stock was prepared and stored at -20°C in batches;  
102 aliquots were diluted for each experiment to a final concentration (vol/vol) of 12.5% in sterile  
103 phosphate buffered saline (PBS; pH = 7.4). Endotoxin concentrations ranged from 150-175  
104 EU/mL as determined using the limulus amoebocyte lysate assay (Lonza, Walkersville, MD, USA).  
105 This concentration of ODE has been previously shown to produce optimal experimental effects  
106 and is well-tolerated in mice (11, 12).

## 107 **Animal co-exposure model**

108 The protocol for the co-exposure model has been previously described (11). Briefly, mice  
109 were age-matched and randomized to 4 treatment groups: Sham (saline injection, saline  
110 inhalation), collagen-induced arthritis (CIA; CIA injection, saline inhalation), ODE (saline  
111 injection, ODE inhalation), and CIA + ODE (CIA injection, ODE inhalation). CIA was induced  
112 with two subcutaneous tail injections (100 µg) of chick type II collagen (2 mg/ml) emulsified in  
113 Freund's complete adjuvant (FCA) on day 1 and in Freund's incomplete adjuvant (IFA) on day 21.  
114 Sham injections and saline inhalation were conducted with sterile PBS. Following an established  
115 protocol, 50 µl of intranasal saline or 12.5% ODE daily for 5 weeks (weekends excluded) was  
116 used to induce airway inflammatory disease (11, 12).

## 117 **Single-cell RNA sequencing**

118 Mice were euthanized with isoflurane in a desiccator. Tracheostomy was performed for  
119 cannula insertion. Lungs were exposed from the thoracic cavity and perfused with 10 ml heparin-  
120 PBS (11). Harvested lungs were dissociated with gentleMACS dissociator (Miltenyi Biotech,

121 Auburn, CA, USA) in a digestion solution (collagenase I, 0.2  $\mu\text{g}/\mu\text{l}$  + DNase I, 75 U/ml + heparin,  
122 1.5 U/ml, in Dulbecco's Modified Eagle's Media; DMEM) and incubated for 30 minutes at 37 °C  
123 in a shaking incubator. Digestion solution activity was neutralized with PBS containing 4 mM  
124 EDTA. Red blood cells were lysed with 1 ml ammonium-chloride-potassium (ACK) lysis buffer  
125 (Quality Biological, Gaithersburg, MD, USA) for 1 minute and neutralized with ice-cold DMEM  
126 (Gibco). Cells were processed for RNAseq in FACS buffer (2% fetal bovine serum (FBS) + 0.1%  
127  $\text{NaN}_3$  in PBS). All reagents purchased from Sigma unless otherwise specified.

128 Single cell suspensions generated from whole lung were quantified and viability tested using  
129 a LUNA-FL™ Dual Fluorescence Cell Counter (Logos Biosystems, Annandale, VA, USA).  
130 Single cells were then isolated from cell suspensions (100-2,000 cells/ $\mu\text{l}$ ) using a 10x Chromium  
131 controller per manufacturer's suggested protocol (10x Genomics, Pleasanton, CA). Following cell  
132 capture, the gel beads in emulsion (GEM)/sample solution was recovered and placed into strip  
133 tubes. Reverse transcription was performed on a thermocycler (C1000 Touch™ Thermal Cycler,  
134 Bio-Rad, Hercules, CA, USA) per recommended protocol followed by cDNA amplification.  
135 Amplified products were solid phase reversible immobilization (SPRI) bead-purified and  
136 evaluated by Fragment Analyzer (Agilent, Santa Clara, CA, USA). Twenty-five percent of the  
137 cDNA volume was subjected to fragmentation and double-sided SPRIselect (Beckman Coulter,  
138 Indianapolis, IN, USA) was used for PCR purification and clean-up. After adaptor ligation, SPRI  
139 clean-up was performed and PCR amplification using sample specific indexes for each sample was  
140 completed. PCR products were purified, quantified and library size distribution determined by  
141 Fragment Analyzer. Libraries were sequenced per the manufacturer's suggested parameters on a  
142 NextSeq500 sequencer to an average depth of 50,000 reads per cell.

## 143 **Single-cell RNA sequencing data processing**

144 Basecall files (BCL) were generated through 10xGenomics Chromium Single cell 3'  
145 Solution followed by RNA Sequencing using Nextseq 500 and Nextseq 550. *Cellranger mkfastq*  
146 was used for demultiplexing and to convert BCL files into FASTQ files. FASTQ files were run  
147 through *Cellranger count* to perform alignment (using STAR aligner), filtering, and unique  
148 molecular identifier (UMI) counting. Chromium cellular barcodes were used to generate gene-  
149 barcode matrices, perform clustering, and do gene expression analyses. *Cellranger aggr* was used  
150 to normalize and pool the results from different samples, followed by the application of Principal  
151 Components Analysis (PCA) to change the dimensionality of the datasets. t-SNE (t-Stochastic  
152 Neighbor Embedding) was used to visualize the data in a 2-D space. Graph-based unsupervised  
153 clustering was then used to cluster the cells. We used Loupe browser (13), R packages including  
154 cellranger R-kit (14), complex heatmap (15), and Geom\_violin (16) for more in-depth analysis to  
155 compare genes expression in each cluster compared to all the other clusters and plot the data. The  
156 data sets have been deposited to the Gene Expression Omnibus (GEO) database with access  
157 number GSE155436.

## 158 **Lung cell sorting**

159 In separate studies, following mouse euthanasia and lung perfusion, lungs were inflated with  
160 1 ml digestion solution/mouse containing 0.5 mg/ml Liberase<sup>TM</sup> (medium Thermolysin  
161 concentration; Millipore Sigma, St. Louis, MO, USA) and 235.5 U/ml DNase I in Hank's  
162 Balanced Salt Solution (pH=7.2). Inflated lungs were dissociated with gentleMACS dissociator  
163 (Miltenyi Biotech, Auburn, CA, USA) and incubated for 15 minutes at 37 °C in a shaking  
164 incubator. Digestion solution activity was neutralized with FA3 buffer (10mM HEPES, 2mM  
165 EDTA, 1% FBS in PBS). The single cell lung suspensions were incubated with CD16/32 (Fc Block  
166 BD Biosciences, San Jose, CA) to minimize nonspecific antibody staining. Next, cells stained with



167 mAbs directed against rat anti-mouse CD45 (clone 30-F11), Ly6C (clone AL-21), Ly6G (clone  
168 1A8), CD11b (clone M1/70), and hamster anti-mouse CD11c (clone N418), and live/dead fixable  
169 blue dead cell stain kit (Invitrogen, Eugene, OR, USA) . Antibodies to CD45 were obtained from  
170 eBiosciences (Santa Clara, CA, USA); CD11b and Ly6G from BioLegend (San Diego, CA, USA);  
171 CD11c from Invitrogen, and the remainder from BD Biosciences. Flow-sorting was done with  
172 FACS Aria II (BD Biosciences). Live CD45<sup>+</sup> singlets were gated on Ly6C<sup>+</sup>Ly6G<sup>+</sup> to sort  
173 neutrophils. Lymphocytes (based on FSC and SSC) and neutrophils (based on Ly6C and Ly6G  
174 staining) were then reverse gated to further select for 3 monocyte/macrophage populations:  
175 macrophage (CD11c<sup>high</sup>, CD11b<sup>variable</sup>), monocytes-macrophages (CD11c<sup>intermediate</sup>, CD11b<sup>high</sup>), and  
176 monocytes (CD11c<sup>-</sup>, CD11b<sup>high</sup>).

## 177 **RNA isolation**

178 The 4 cell-sorted populations were counted, assessed for viability by trypan blue exclusion  
179 (>95%), washed and lysed with RLT buffer containing  $\beta$ -mercaptoethanol for RNA isolation as  
180 per manufacturer's instructions with Qiagen RNeasy Micro Kit (Qiagen, Germantown, MD,  
181 USA).

## 182 **NanoString nCounter system**

183 Quality and quantity of total RNA was evaluated using a Fragment Analyzer (Agilent, Santa  
184 Clara, CA, USA) and Nanodrop (ThermoFisher), respectively. Total RNA (25-50 ng) was  
185 hybridized and processed per the manufacturer's suggested protocol with capture and reporter  
186 probes to prepare target-probe complexes using reagents from the Mouse Autoimmune profiling  
187 panel containing 771 genes (NanoString, Seattle, WA, USA). Complexes were purified,  
188 immobilized and aligned on a cartridge for counting on the nCounter system and processed as per  
189 the manufacturer's instructions.

190 For NanoString analyses, three independent studies of 2-3 pooled mice per  
191 group/experiment (N=3) were analyzed by two-way ANOVA with Tukey's multiple comparisons  
192 test. Gene expression data were normalized to 20 housekeeping genes, treatment groups (CIA,  
193 ODE and CIA+ODE) were compared to Sham, and data plotted as fold-change. One-way ANOVA  
194 with Tukey's multiple comparison test was used on myeloid-derived suppressor cell (MDSC)  
195 posthoc analysis. Bar graphs were used to depict means with standard errors of the ratio change in  
196 MDSCs normalized to Sham (percentile of MDSC treatment group divided by percentile of MDSC  
197 Sham group). Statistical analyses were performed using the GraphPad Prism software, version  
198 8.4.3 (GraphPad, San Diego, CA), and statistical significance accepted at p-values <0.05.

199

## 200 **Results**

### 201 **ScRNA-seq identifies 14 unique immune cell subsets**

202 The 10x genomics platform was utilized to cumulatively capture all lung cells. In total,  
203 16,822 cells were analyzed with a mean of 42,901 post-normalization reads per cell and 956  
204 median genes per cell. Unsupervised clustering was performed on 11,577 CD45<sup>+</sup> cells and plotted  
205 on *t*-distributed Stochastic Neighbor Embedding (t-SNE). Projection of cells was colored based on  
206 unique molecular identifier (UMI) count to identify level of transcripts among the cells. The  
207 average UMI count range was roughly between 2,000 to 12,000. Cells that were distributed in the  
208 middle showed the highest level of transcripts while cells at the top showed the lowest level (Figure  
209 1A). Unsupervised clustering on the t-SNE projected cells revealed 14 unique immune cell subsets  
210 coded by different colors and arbitrary numbers (Figure 1B). Clusters 3, 4 and 8 were identified  
211 as neutrophil subsets based on distribution of *Csf3r* (granulocyte colony stimulating factor receptor  
212 (17)) in t-SNE analysis. (Figure 1C). Macrophages were distributed in the middle and were

213 identified with *Cd11c* (ITGAX) expression in clusters 1, 2, 5, 11, 14, and partially in cluster 10.  
214 Monocytes (inflammatory monocytes) were identified with *F13a1* expression in cluster 12. Cluster  
215 9 showed high levels of *Ccl5* expression suggesting the presence of NK cells. Similarly, *Cd19*  
216 expressing cells in cluster 7 identified B lymphocytes, and *Trbc2* expression in clusters 6 and 13  
217 identified T lymphocytes, along with expression in the NK cell population (cluster 9). Dendritic  
218 cells (DCs) were located in cluster 10 and were characterized by *Siglech* expression, particularly  
219 evident in cluster 10a (Figure 1C).

## 220 **CIA and ODE drive unique distributions of immune cells within** 221 **identified clusters**

222  
223 The 4 treatment groups (Sham, CIA, ODE, and CIA+ODE) exhibited unique distributions of  
224 lung immune cells among the identified clusters (Figure 2A-B). Among the neutrophil clusters,  
225 Sham was exclusively represented by cluster 4, but not cluster 3 or 8. In contrast, the CIA group  
226 almost entirely showed neutrophil distribution in cluster 3. The ODE group demonstrated selective  
227 distribution of neutrophils in cluster 8 with overlap into cluster 4. In the combination exposure  
228 CIA+ODE group, there was broader distribution of neutrophils with predominance in cluster 3,  
229 but also evidence for distribution in cluster 4 and partially in cluster 8 (Figure 2A-B).

230 Among the macrophage clusters, the ODE group had prevalence in clusters 5, 1b and 1c  
231 compared to the CIA group. Likewise, the ODE group lacked clusters 1a and 2a. A subset of cluster  
232 12 (12b) and cluster 10 (10b) were unique to the CIA group, while clusters 10a and 12a were  
233 unique to the ODE group. The combination group with CIA+ODE showed a mixed population  
234 representing CIA and ODE, while leaning more towards the CIA group (Figure 2A-B).

235 Lymphocyte populations were confined to clusters 6, 7, 9, and 13, and were represented in  
236 all treatment groups, although modest shifts in cell population distribution were observed.

237 Particularly, NK cells (cluster 9) and B cells (cluster 7) were differentially expressed in ODE and  
238 CIA treatment groups with apparent shifts from cluster 9a in ODE to cluster 9b in CIA and shifts  
239 from cluster 7a in ODE to cluster 7b in CIA, respectively. Similar to the macrophage clusters, the  
240 CIA+ODE group portrayed CIA and ODE group while inclining more towards the CIA group  
241 (Figure 2A-B).

### 242 **Three distinct neutrophil populations revealed by scRNA-seq among** 243 **treatment groups**

244  
245 Unsupervised clustering segregated 3 populations of granulocytes/neutrophils that were  
246 marked by unique gene expression (Figure 3A). Relative gene-expression compared to all other  
247 cell populations as log<sub>2</sub> fold-change was plotted in a heat map (Figure 3B) and violin plot (Figure  
248 3C) to compare transcript levels as well as cell distributions at different expression levels. Cluster  
249 8 showed increased expression of inflammatory genes such as *Ccl3*, *Ccl4*, *Cxcl2*, *Upp1* and  
250 *Marcks1* (log<sub>2</sub> fold-change range: 4.98-6.35), which are genes commonly upregulated in activated  
251 neutrophils (Figure 3B-C, and S1 Table) (18-22). Moreover, cluster 8 was exclusive to the ODE  
252 group. In contrast, cluster 3 exhibited increased expression of genes associated with  
253 immunosuppression and autoreactivity as well as genes that are characteristic of granulocytic  
254 MDSC (gMDSC) such as *S100a8*, *S100a9*, *Mmp8*, *Ifit3b*, *Ifit3*, *Cd33*, *Cd52* and *Stfa211* (log<sub>2</sub> fold-  
255 change range: 5.16-6.03) (Figure 3B-C, and S1 Table) (23-29). Based on the gene expression  
256 profiles, cluster 8 was identified as “inflammatory neutrophils” and cluster 3 was identified as  
257 “gMDSC/autoreactive neutrophils”. Intermediate to the two cell subsets, another neutrophil subset  
258 (cluster 4) was identified as resident/transitional neutrophils. This population of neutrophils  
259 (Figure 3, B-C, and S1 Table) demonstrated increased expression of *Csf3r*, *Il1r2*, *Slc40a1*, *Cxcr2*,  
260 and *Lmnb1* genes (log<sub>2</sub> fold-change range: 3.91-4.24) that are required in neutrophil differentiation

261 and trafficking (17, 30-35). Neutrophils in the CIA+ODE group was distributed more like the CIA  
262 than the ODE group with predominant segregation in clusters 3 and 4 (Figure 2).

263 Signature genes were selected to highlight respective neutrophil populations on the t-SNE  
264 plot (Figure 3D). *Ccl3* was selected to highlight “inflammatory neutrophil” as *Ccl3* enhances  
265 recruitment and activation of neutrophils in a paracrine fashion (18, 19). Because *Il1r2* gene  
266 encodes for type 2 interleukin-1 receptor and is constitutively expressed in mouse neutrophils (30),  
267 it identified all subsets of neutrophils in the t-SNE clusters (Figure 3D). Autoreactive  
268 neutrophils/gMDSCs were exclusively positive for *Mmp8* and *Ifit3* in t-SNE. *Mmp8* is a neutrophil  
269 collagenase (36, 37) and *Ifit3* codes for interferon induced protein with tetratricopeptide repeats 3,  
270 as both are highly upregulated in gMDSCs and can suppress immune response (26, 27).

## 271 **Identification of unique macrophage/monocyte/DC populations**

272 Based on gene expression patterns among segregated populations found with unsupervised  
273 clustering, 5 discrete macrophage clusters, 1 inflammatory monocyte cluster, and 1 DC cluster  
274 were identified (Figure 4A). Cluster 1 was termed “airspace macrophages” based on increased  
275 expression (log<sub>2</sub> fold-change range: 1.52-1.98) of *Ear1*, *Ear2*, *Ltc4s*, *Fabp1* and *Lyz2* compared  
276 to other clusters (Figure 4B-D), representing genes responsible for metabolism and  
277 inflammation/resolution (38-42) (S2 Table). Cluster 2 was labeled as “differentiating/recruited  
278 macrophages” as this cluster exhibited the highest expression (log<sub>2</sub> fold-change range: 1.27-1.54)  
279 of *Net1*, *Tcf7l2*, *Abcg1*, *Pla2gl15* and *Mrc1* representing genes implicated in differentiation, antigen  
280 uptake, and macrophage recruitment (43-47) (Figure 4B-D). Cluster 2 macrophages expressed  
281 genes associated with alternatively activated macrophages (M2 macrophages) (44, 47), and  
282 upregulate pathways for lipoprotein metabolism and redox signaling (S2 Table). Cluster 5 was  
283 identified as “recruited macrophages” based on the disproportionate expression (log<sub>2</sub> fold-change

284 range: 1.5-1.96) of *Inhba*, *Cxcl3*, *Hmox1*, *Tgm2*, and *Car4* (Figure 4B-D). Cluster 5 was  
285 heterogeneous with *Inhba* representing classically activated (M1) macrophages or *Hmox1* as M2  
286 macrophages, and also included genes that are involved in inflammation, adipogenesis,  
287 homeostasis and phagocytosis (48-57) (S2 Table).

288 Sham, CIA and CIA+ODE groups showed similar distribution of airspace (particularly  
289 cluster 1a) and recruited macrophages (especially cluster 2a) while the ODE group had a  
290 substantial reduction in these macrophage populations with segregation towards the center of the  
291 t-SNE plot in clusters 1b and 1c (Figure 2).

292 Cluster 11 was designated as “resident interstitial macrophages” with high transcript levels  
293 of *ApoE*, *Ccl2* and complement genes such as *Clqc*, *Clqb* and *Clqa* (Figure 4B-D) ranging from  
294 log<sub>2</sub> fold-change of 3.54-3.91. This population also displayed heterogeneity with expression of  
295 both M1 and M2 genes (42, 58-62) involved in inflammation and resolution (S2 Table). Resident  
296 interstitial macrophages were more evident in the ODE compared to other treatment groups (Figure  
297 2).

298 As reported by Mould *et. al.* (63), we also identified a distinct cluster of macrophages (cluster  
299 14) with very high expression of proliferative and mitotic genes (log<sub>2</sub> fold-change range: 5.79-  
300 8.12) including *Nusap1*, *Top2a*, *Birc5*, *Pclaf*, and *Mki67* (Figure 4B, 4C and 4D), which were  
301 termed “proliferative airspace macrophages.” The upregulated pathways included cell-cycle,  
302 mitosis or proliferation-related pathways (S2Table) (63-65). These proliferative airspace  
303 macrophages were represented largely by the ODE and CIA+ODE groups (Figure 2).

304 Cluster 12 represented a unique cell population identified as “inflammatory monocytes.”  
305 This population exhibited increased expression of *F13a1*, *Ms4a4c*, *Ly6c2*, *Plac8* and *Ccr2* (Figure  
306 4B-D) (log<sub>2</sub> fold-change range: 4.65-6.53), all characteristically expressed in inflammatory

307 monocytes and often correlated with anti-viral and/or autoimmune responses (66-74). Although  
308 CIA+ODE group had a pronounced cluster 12, 12b represented the CIA group and ODE group  
309 exhibited cluster 12a (Figure 2). A cell population in cluster 10 was identified demonstrating  
310 elevated expression in genes (log<sub>2</sub> fold-change range: 2.61-6.48) of *Siglech*, *Tcf4*, *Rnase6*, *Pou2f2*  
311 and *Bst2* (Figure 4, B-D), which are distinctive of DCs (75-81). This population demonstrated  
312 characteristics of plasmacytoid DCs involving genes associated with innate immunity and anti-  
313 inflammatory pathways. The DC predominated with ODE and CIA+ODE groups in cluster 10a,  
314 whereas cluster 10b predominated with Sham (Figure 2). Overall, CIA+ODE group distribution  
315 of monocyte-macrophages followed neutrophils with overrepresentation of CIA group (Figure 2).

### 316 **Lymphocytes segregate in four clusters among treatment groups**

317 Four discrete lymphocyte clusters were found in the analysis (Figure 5A). Cluster 6 was  
318 identified as “T lymphocytes”, with increased expression (log<sub>2</sub> fold-change range: 4.87-7.04) of  
319 *Lef1*, *Igfbp4*, *Tcf7*, *Cd3d*, and *Cd3e* (Figure 5, B-D). This population favored type 2 CD4<sup>+</sup> cells  
320 based upon the expression of differentiating or expanding population of T lymphocytic genes (82-  
321 86). Cluster 6a was more represented by Sham whereas cluster 6b was represented by CIA and  
322 CIA+ODE treatment groups. The ODE group had sparse distribution between cluster 6a and 6b  
323 (Figure 2). In contrast to cluster 6, cluster 13 exhibited increased expression of genes indicative of  
324 activated T lymphocytes including *Icos*, *Thy1*, *Cd3g*, *Ikzf2* and *Maf* (log<sub>2</sub> fold-change range: 4.87-  
325 5.87) and thus were termed as “effector T lymphocytes” (Figure 5, B-D) with upregulation of co-  
326 stimulatory and adaptive immune pathways. Subtle differences were observed in the distribution  
327 of activated T lymphocytes among the treatment groups (Figure 2).

328 Cluster 7 was remarkable for increased gene expression characteristic of B lymphocytes such  
329 as *Ebfl*, *Cd79a*, *Ms4a1*, *Cd79b* and *Ighd* (log<sub>2</sub> fold-change range: 7.29-7.77) (Figure 5B-D).

330 Along with genes implicated in B-cell differentiation, memory, signaling and autoimmunity, this  
331 cluster showed striking similarities with upregulated pathways in the T lymphocyte population (S3  
332 Table) (87-90). B lymphocytes had an overall distribution in CIA+ODE group, but largely  
333 represented as cluster 7b in the CIA group. The ODE group had very few B lymphocytes with  
334 sparse distribution (Figure 2).

335 NK cell-specific gene expression was increased in cluster 9 with *Ncr1*, *Ccl5*, *Gzma*, *Nkg7*  
336 and *Prfl* (Figure 5, B-D) ranging from 7.83 to 7.87 log<sub>2</sub> fold-change (S3 Table). These genes and  
337 pathways were predominately related to NK cell recruitment, activation and effector function (91-  
338 96). The Sham and ODE groups were represented by cluster 9a while the CIA group had more of  
339 cluster 9b. The CIA+ODE group had 9a and 9b clusters (Figure 2).

## 340 **Differential gene expression of ex vivo sorted lung neutrophils across** 341 **treatment groups represent disease progression**

342  
343 To understand the relevance of myeloid-derived lung cells in RA and RA-associated lung  
344 disease, these studies sought to determine whether gene expression of sorted lung myeloid-derived  
345 cells corresponded to disease-specific findings among treatment groups. Lung neutrophils were  
346 isolated by fluorescence activated cell sorting (FACS) based on traditional cell surface markers as  
347 Ly6C<sup>+</sup> Ly6G<sup>high</sup> cells (Figure 6A, gating strategy). By NanoString analysis, upregulated genes of  
348 isolated neutrophils resembled the gene expression demonstrated in scRNA-seq data by respective  
349 treatment groups. Neutrophils isolated from lungs of CIA and CIA+ODE groups (as compared to  
350 Sham) demonstrated increased transcript levels of genes involved in autoimmunity as well as genes  
351 associated with gMDSCs/autoreactive neutrophils. These included (CIA and CIA+ODE): *Ifit3*  
352 (21.7 and 7.49-fold), *Ifit1* (17.2 and 5.9-fold), *Oas2* (17.0 and 6.0-fold), *Zbp1* (14.6 and 8.5-fold),  
353 *Cxcl9* (5.1 and 8.5-fold), and *Oas1a* (12.5 and 7.2-fold) (Figure 6B and 6C). Interestingly, the



354 CIA+ODE group also showed gene expression that paralleled that of the ODE group, including  
355 increased transcript levels of *Src* (CIA+ODE: 6.1-fold and ODE: 7-fold), *Pf4* (7.7 and 5.3-fold),  
356 and complement cascade genes such as *C2* (9.6 and 6-fold-change), and *Cfb* (9.2 and 2.5-fold-  
357 change) (Figure 6B and 6C). In contrast, the ODE group demonstrated exclusive upregulation of  
358 *Ltf* (4.7-fold-change), *Ccl4* (3.2-fold), *Ccl3* (2.8-fold) and *Il1rn* (2.5-fold) as compared to Sham,  
359 consistent with the inflammatory neutrophil cluster (Figure 6B-C). There was a single complement  
360 cascade gene (*C1s1*) that was exclusively upregulated in CIA+ODE (4.3-fold) (Figure 6C).

### 361 **Macrophage and monocyte populations from CIA and CIA+ODE** 362 **groups exhibit gene profiles comparable to RA and RA-associated** 363 **lung disease, respectively**

364  
365 After excluding lymphocytes and neutrophils, 3 separate lung monocyte-macrophage  
366 populations were sorted based upon CD11c and CD11b expression (S1 Figure and Figure 7A).  
367 These 3 populations are 1) CD11c<sup>high</sup>CD11b<sup>variable</sup> macrophages, 2) CD11c<sup>intermediate</sup>CD11b<sup>high</sup>  
368 mono-macs and 3) CD11b<sup>high</sup>CD11c<sup>-</sup> monocytes. Of the CD11c<sup>high</sup> macrophages, the expression  
369 of CD11b (evident on the pseudocolor plots; Figure 7A) shifts to the right: CIA+ODE>ODE>CIA  
370 as compared to Sham. Increasing expression of CD11b on CD11c<sup>+</sup> macrophages suggest an  
371 activated phenotype (97). Similar to neutrophils, the isolated macrophage population also  
372 demonstrated increased gene expression in CIA and CIA+ODE group that included *Clqb* (8.6 and  
373 8.2-fold), *Cxcl9* (10.9 and 6-fold), *Clqa* (7.5 and 7.6-fold), *Ifi44l* (3.6 and 3.2-fold), *Cmklr1* (2.1  
374 and 9.3-fold), *Ccl8* (3.2 and 7.6-fold), *Sdc1* (2.3 and 7.8-fold), and *Ms4a4a* (3.8 and 5.3-fold).  
375 Increased expression of *Gzma* was unique to the CIA group (6-fold) (Figure 7B-C), while *C1s1*  
376 was upregulated in both CIA+ODE (6.5-fold) and ODE (3-fold) groups along with *Pf4* (7.9 and  
377 7.3-fold), *Itgam* (4.2 and 5.4-fold), and *Pdpm* (4 and 4.2-fold). Expression of *Src* (4.7, 5.6 and 6.4-

378 fold) and *Blnk* (2.3, 5.1 and 5.9-fold) was increased in all treatment groups (CIA, ODE and  
379 CIA+ODE) as compared to Sham (Figure 7, B-C).

380 The CD11c<sup>intermediate</sup>CD11b<sup>+</sup> monocyte-macrophage population demonstrated increased  
381 expression of several interferon-associated and other genes implicated in autoimmune responses  
382 in CIA and CIA+ODE groups including *Gbp2* (7.4 and 6.9-fold), *Zbp1* (7 and 2-fold), *Ifi44* (6.6  
383 and 4.3-fold), *Ifi44l* (6 and 5.1-fold), *Cxcl9* (5.8 and 8.1-fold), and *Fcgr1* (2.4 and 2.9-fold). ODE  
384 and CIA+ODE groups demonstrated increased expression of *Cxcl5* (3.4 and 2.6-fold), *Pdpn* (4.2  
385 and 3.3-fold), *Pf4* (5.4 and 3.8-fold), and *Cxcl13* (6.8 and 3.6-fold) compared to Sham (Figure 8A-  
386 B). *Cfb* (5.9, 4.1, and 16.3-fold), *Ccl8* (11.3, 5.1, and 6.7-fold), and *Cls1* (5.8, 7, and 19.3-fold)  
387 were overexpressed in CIA, ODE and CIA+ODE groups, respectively, compared to Sham.  
388 Expression of non-canonical I-kappa-B kinase, *Ikbke*, associated with anti-viral responses and  
389 autoimmune diseases, was increased in the CIA+ODE group (2.5-fold) compared to Sham (Figure  
390 8,-B).

391 The monocyte population (CD11c<sup>-</sup>CD11b<sup>+</sup>) was unique because all the upregulated genes  
392 including *Oas1l* (15 and 4.6-fold), *Oas1a* (15.6 and 15.3-fold), *Oas2* (11.7 and 12.4-fold), *Ifi44*  
393 (11.0 and 9.5-fold), *Ifi44l* (11.1 and 11.1-fold), *Siglecl1* (11.1 and 6.1-fold), *Gbp2* (2.9 and 5.3-  
394 fold), *Gbp5* (3.8 and 4.3-fold), *Stat1* (3.3 and 3.8-fold), and *Isg15* (4.1 and 3.7-fold) were increased  
395 in both CIA and CIA+ODE groups respectively (Figure 9A-B). Moreover, these genes are mostly  
396 associated with autoimmunity or immunosuppression (27, 52). The ODE group exhibited higher  
397 transcript levels of *Ccl8* (7.5-fold), *Pdpn* (6.4-fold), *Fcrls* (4.9-fold) and *Src* (4.7-fold), consistent  
398 with the other sorted neutrophil and monocytes/macrophages populations. While *Cfb* expression  
399 was increased in all 3 treatment groups, *Dnmt3a* was upregulated (2.3 and 3.4-fold) in ODE and  
400 CIA+ODE groups, respectively (Figure 9, A-B), but not in CIA.

401 Finally, gMDSCs were identified as Ly6C<sup>+</sup>Ly6G<sup>high</sup>CD11b<sup>high</sup>SSC<sup>high</sup> (S2 Figure) (98, 99)  
402 on posthoc gating of sorted neutrophil populations resulting in non-significant variations across  
403 the treatment groups (Figure 10A). In contrast, mMDSC defined as Ly6G<sup>-</sup> CD11b<sup>+</sup> Ly6C<sup>high</sup>  
404 SSC<sup>low</sup> cells (S2 Figure) (98, 99) were increased with CIA but decreased with ODE and CIA+ODE  
405 (Figure 10B).

406

## 407 Discussion

408 In this study, scRNA-seq analysis was applied to whole lung immune cells from a mouse  
409 model of RA-associated inflammatory lung disease with key findings confirmed in sorted lung cell  
410 populations and NanoString analysis. Building upon the preclinical model of RA-associated  
411 inflammatory lung disease (11), we report a number of key findings in this study including: (a)  
412 identification of 3 unique neutrophil populations including inflammatory, transient and  
413 immunosuppressive/autoreactive granulocytes among experimental groups, (b) heterogeneity  
414 among 5 macrophage populations including metabolically active, proliferative, differentiating,  
415 recruited, and residential with classical (M1) and alternatively (M2)-activated genes, (c)  
416 identification of 2 stages of T-lymphocytes (differentiating and effector), a B-cell population and  
417 a NK cell cluster, (d) variability in the distribution of cellular clusters among the treatment groups  
418 representing RA and RA-associated lung disease (CIA and CIA+ODE groups, respectively), (e)  
419 identification of gMDSC and mMDSC populations based on cell surface markers, and (f)  
420 identification of unique genes (interferon-related/autoimmune and complement cascade) that are  
421 found in a mouse model of RA-associated inflammatory lung disease.

422 Occupational exposures from farming, construction, mechanics, medical and military waste  
423 have been associated with increased risk of development of RA and/or RA-associated lung disease

424 (100-104). However, precise mechanism(s) of the development of RA-associated lung disease with  
425 occupational and/or environmental inflammatory exposures is not known. Working towards  
426 identifying these mechanisms, previous studies demonstrated that repeated exposure to microbial-  
427 enriched ODE and particularly ODE+CIA increases citrullination and malondialdehyde-  
428 acetaldehyde (MAA)-adduction of lung proteins with a corresponding increase in circulating  
429 autoantibody concentrations, periarticular bone damage, and increased deposition of extracellular  
430 matrix proteins with a reduction in classical airway inflammatory markers (11, 105). These  
431 findings suggested a transition of inflammatory lung disease towards a pro-fibrotic phenotype.  
432 Leveraging this co-exposure mouse model with CIA and ODE, several immune cell populations  
433 exhibiting unique gene expression signatures that were differentially distributed across treatment  
434 groups were demonstrated that suggest potential roles in the pathogenesis of RA, inflammatory  
435 lung disease, and inflammatory lung disease specific to RA.

436 Neutrophils have been classically related to inflammation and host response to pathogens  
437 (106). Knowledge of their role in inflammation and homeostasis continues to evolve as various  
438 subsets of neutrophils have been identified and proposed based upon steady state, inflammatory,  
439 or anti-inflammatory programming (107). Many intermediate phenotypes have also been defined,  
440 further complicating classifications and the proposed roles in both disease and homeostasis (108).  
441 The 3 different neutrophil populations currently identified aptly signify an inflammatory (in ODE),  
442 anti-inflammatory (or autoreactive) (in CIA and CIA+ODE) and homeostatic (transient) (in  
443 Sham). Further studies are needed to delineate precisely how these sub-populations program the  
444 lung immune response towards inflammatory and pro-fibrotic disease states.

445 MDSCs have been implicated in RA (109) as well as ILD (110). However, their relationship  
446 to the RA-associated lung disease is not well-established. MDSCs are transient populations

447 representing myeloid cells at various stages of differentiation that suppress immunity and are  
448 subdivided into granulocytic (g) or monocytic (m) origin (111-113). MDSCs are identified by their  
449 high expression of *Nox2*, calprotectin (*S100a8/S100a9*), *Mmp8*, *Mmp9*, *Cd33*, and multiple  
450 interferon-inducible genes such as *Ifit3*, *Ifit1*, *Oas2*, *Zbp1*, *Ifi44*, *Ifi44l* and *Oas1a* (114, 115). By  
451 scRNA-seq analysis, resolution of gMDSC was high with population segregation in cluster 3,  
452 which was driven by systemic arthritis induction (i.e. CIA and CIA+ODE groups). This finding  
453 was further strengthened by the RNA analysis of the sorted Ly6G<sup>+</sup> Ly6C<sup>+</sup> neutrophil population of  
454 corresponding treatment groups. Posthoc analysis confirmed that the sorted group contained  
455 gMDSCs with Ly6G<sup>+</sup> Ly6C<sup>+</sup> CD11b<sup>high</sup> SSC<sup>high</sup> gating (98, 99), but there was no difference across  
456 treatment groups. Unsupervised clustering of immune cells did not segregate mMDSCs. However,  
457 gene expression of sorted monocyte-macrophage populations based on CD11b and CD11c  
458 expression suggested the presence of mMDSC-like properties based upon the immunosuppressive  
459 genes that were elevated in CIA and CIA+ODE groups. Using a classical gating strategy (Ly6G<sup>-</sup>  
460 CD11b<sup>+</sup> Ly6C<sup>high</sup> SSC<sup>low</sup>) for mMDSCs (99), mMDSCs were identified with FACS and found to  
461 be decreased in combination (CIA+ODE) exposure group. These findings are consistent with a  
462 recent report that showed that the expansion of MDSCs following tofacitinib treatment is inversely  
463 related to the progression of ILD in the SKG mouse model of RA-ILD (116). These collective  
464 findings would suggest a potential protective role for lung MDSCs (particularly mMDSCs) in the  
465 development RA-related lung disease, and future studies are warranted to understand their role in  
466 disease manifestations to potentially develop novel targets for therapeutic interventions.

467 Macrophages are one of the most versatile immune cells with immense population  
468 heterogeneity and diverse functions (117, 118). Macrophages are increasingly appreciated for their  
469 role in fibrosis, wound repair and resolution (42, 63, 119). In this current study, the metabolically

470 active airspace macrophages, resident, recruited and differentiating macrophages (clusters 1, 11, 5  
471 and 2, respectively) contribute to inflammation and resolution, while the proliferative airspace  
472 macrophages (cluster 14) signify self-renewing properties to maintain a steady population in the  
473 lungs. These studies potentially open avenues for hypothesis generation based on various non-  
474 traditional genes (interferon-related/autoimmune and complement cascade) expressed in the  
475 macrophage subsets that have not been previously investigated in health and disease. The unique  
476 distribution of various macrophage clusters among the treatment groups, particularly clusters 1b,  
477 1c, 5 and 11 in ODE group, and clusters 1a, 2a and 12b (inflammatory monocytes) in CIA and  
478 CIA+ODE groups signify their importance in disease transition from RA to RA-associated lung  
479 disease.

480 Subtle differences among lymphocyte populations (clusters 6, 7, 9 and 13) support earlier  
481 work demonstrating that B lymphocytes are skewed towards an autoreactive response following  
482 airborne biohazard exposure (105). B lymphocytes have been recognized as one of the major  
483 drivers of autoimmunity (120) and are the target of highly effective RA therapies such as rituximab  
484 (121). Colocalization of MAA with autoreactive B lymphocytes in lung tissues of RA-ILD patients  
485 (122) further signifies their potential role in the pathogenesis of RA-ILD. While NK cells are  
486 considered a bridge between innate and adaptive immune responses (123), targeting cluster 9b  
487 could be of interest. Similarly, autoreactive T lymphocytes (perhaps cluster 6b) and cellular  
488 phenotypes supporting fibroproliferation with increase in activated fibroblasts with extracellular  
489 matrix deposition could be of particular interest in RA-ILD.

490 In addition to confirming the upregulation of several interferon-induced genes implicated in  
491 autoimmunity, complement cascade genes such as *Clra*, *Clqa*, *Clqb*, *C2*, and *Cfb* representing  
492 classical and alternative pathways (124) were identified. *C1s1* was highlighted among the

493 complement cascade genes due to its high expression, and was invariably upregulated in the  
494 CIA+ODE group in all 4 cell-sorted neutrophil and monocyte-macrophage populations. *CI* acts as  
495 a sensor for self and non-self-recognition and thus plays a major role in self-tolerance (125).  
496 Complement cascade genes are recognized in RA (126) and ILD (127-129), but remain overlooked  
497 as therapeutic targets (130). Holers *et. al.* (126) suggested that RA-ILD has a complement  
498 connection, but to our knowledge, this is among the first reports to experimentally identify *C1s1*  
499 or complement cascade genes in a RA-inflammatory lung disease model.

500 In conclusion, application of scRNA-seq to an animal model combining systemic arthritis  
501 induction and environmental inhalant-induced lung inflammation (i.e. RA-associated lung disease)  
502 identified unique populations of lung immune cell clusters differentially ascribed to individual  
503 treatment conditions. Neutrophil subpopulations and heterogeneous macrophage-monocyte  
504 populations were identified in addition to unique genes (interferon-related and complement  
505 cascade) that could be contributing to the pathogenesis of RA-associated lung disease.  
506 Additionally, this information might inform potential candidates that could be exploited in future  
507 investigations examining targeted interventions and the identification of informative disease  
508 biomarkers.

509

## 510 **Acknowledgements**

511 Study supported by grants from the National Institute of Environmental Health Sciences  
512 (R01ES019325 to JAP; [www.niehs.nih.gov](http://www.niehs.nih.gov)), National Institute for Occupational Safety and  
513 Health (U54OH010162 to JAP and TAW; [www.cdc.gov/niosh/index.htm](http://www.cdc.gov/niosh/index.htm)). TAW is the recipient  
514 of a Research Career Scientist Award (IK6 BX003781; [www.va.gov](http://www.va.gov)) from the Department of  
515 Veterans Affairs. TRM is supported by VA (CX000896 and BX004600; [www.va.gov](http://www.va.gov)) and grants

516 from the National Institute of General Medical Sciences (U54GM115458; [www.nigms.nih.gov](http://www.nigms.nih.gov))  
517 and the National Institute on Alcohol Abuse and Alcoholism (R25AA020818;  
518 [www.niaaa.nih.gov](http://www.niaaa.nih.gov)). BRE is supported by grants from the National Institute of General Medical  
519 Sciences (U54GM115458; [www.nigms.nih.gov](http://www.nigms.nih.gov)) and the Rheumatology Research Foundation  
520 ([www.rheumresearch.org](http://www.rheumresearch.org)). Study also supported by the Fred & Pamela Buffett Cancer Center  
521 Shared Resource, supported by the National Cancer Institute under award number P30CA036727.  
522 The University of Nebraska DNA Sequencing Core and Bioinformatics Core receive partial  
523 support from the National Institute for General Medical Science (NIGMS) NE-INBRE (Nebraska  
524 Research Network in Functional Genomics) (P20GM103427; [www.nigms.nih.gov](http://www.nigms.nih.gov)) and COBRE  
525 (1P30GM110768; [www.nigms.nih.gov](http://www.nigms.nih.gov)). This publication's contents are the sole responsibility of  
526 the authors. The funders had no role in study design, data collection and analysis, decision to  
527 publish, or preparation of the manuscript.

528 We thank Victoria B. Smith, Samantha D. Wall, Craig L. Semerad in the Flow Cytometry  
529 Research Facility at UNMC for technical support for flow cytometry studies. We thank Jennifer  
530 L. Bushing in the Sequencing Core at UNMC for assistance with NanoString studies. We also  
531 thank Lisa R. Chudomelka for article preparation assistance and submission.



## 532 **References**

- 533 1. Aubart F, Crestani B, Nicaise-Roland P, Tubach F, Bollet C, Dawidowicz K, et al. High  
534 levels of anti-cyclic citrullinated peptide autoantibodies are associated with co-occurrence of  
535 pulmonary diseases with rheumatoid arthritis. *J Rheumatol*. 2011;38(6):979-82.
- 536 2. Shaw M, Collins BF, Ho LA, Raghu G. Rheumatoid arthritis-associated lung disease. *Eur*  
537 *Respir Rev*. 2015;24(135):1-16.
- 538 3. Friedlander HM, Ford JA, Zaccardelli A, Terrio AV, Cho MH, Sparks JA. Obstructive  
539 lung diseases and risk of rheumatoid arthritis. *Expert Rev Clin Immunol*. 2020;16(1):37-50.
- 540 4. Salaffi F, Carotti M, Di Carlo M, Tardella M, Giovagnoni A. High-resolution computed  
541 tomography of the lung in patients with rheumatoid arthritis: Prevalence of interstitial lung  
542 disease involvement and determinants of abnormalities. *Medicine (Baltimore)*.  
543 2019;98(38):e17088.
- 544 5. Raimundo K, Solomon JJ, Olson AL, Kong AM, Cole AL, Fischer A, et al. Rheumatoid  
545 Arthritis-Interstitial Lung Disease in the United States: Prevalence, Incidence, and Healthcare  
546 Costs and Mortality. *J Rheumatol*. 2019;46(4):360-9.
- 547 6. Janssen KM, de Smit MJ, Brouwer E, de Kok FA, Kraan J, Altenburg J, et al.  
548 Rheumatoid arthritis-associated autoantibodies in non-rheumatoid arthritis patients with mucosal  
549 inflammation: a case-control study. *Arthritis Res Ther*. 2015;17:174.
- 550 7. Perry E, Eggleton P, De Soyza A, Hutchinson D, Kelly C. Increased disease activity,  
551 severity and autoantibody positivity in rheumatoid arthritis patients with co-existent  
552 bronchiectasis. *Int J Rheum Dis*. 2017;20(12):2003-11.

- 553 8. Cassone G, Manfredi A, Vacchi C, Luppi F, Coppi F, Salvarani C, et al. Treatment of  
554 Rheumatoid Arthritis-Associated Interstitial Lung Disease: Lights and Shadows. *J Clin Med*.  
555 2020;9(4).
- 556 9. Wang D, Zhang J, Lau J, Wang S, Taneja V, Matteson EL, et al. Mechanisms of lung  
557 disease development in rheumatoid arthritis. *Nat Rev Rheumatol*. 2019;15(10):581-96.
- 558 10. Anderson R, Meyer PW, Ally MM, Tikly M. Smoking and Air Pollution as Pro-  
559 Inflammatory Triggers for the Development of Rheumatoid Arthritis. *Nicotine Tob Res*.  
560 2016;18(7):1556-65.
- 561 11. Poole JA, Thiele GM, Janike K, Nelson AJ, Duryee MJ, Rentfro K, et al. Combined  
562 Collagen-Induced Arthritis and Organic Dust-Induced Airway Inflammation to Model  
563 Inflammatory Lung Disease in Rheumatoid Arthritis. *J Bone Miner Res*. 2019;34(9):1733-43.
- 564 12. Poole JA, Wyatt TA, Oldenburg PJ, Elliott MK, West WW, Sisson JH, et al. Intranasal  
565 organic dust exposure-induced airway adaptation response marked by persistent lung  
566 inflammation and pathology in mice. *Am J Physiol Lung Cell Mol Physiol*. 2009;296(6):L1085-  
567 95.
- 568 13. 10x Genomics. What is Loupe Browser? 2020 [Available from:  
569 [https://support.10xgenomics.com/single-cell-gene-expression/software/visualization/latest/what-](https://support.10xgenomics.com/single-cell-gene-expression/software/visualization/latest/what-is-loupe-cell-browser)  
570 [is-loupe-cell-browser](https://support.10xgenomics.com/single-cell-gene-expression/software/visualization/latest/what-is-loupe-cell-browser).
- 571 14. Genomics x. Cell Ranger R Kit Tutorial: Secondary Analysis on 10x Genomics Single  
572 Cell 3' RNA-seq PBMC Data 2017 [updated 18 July. Available from:  
573 <http://cf.10xgenomics.com/supp/cell-exp/cellrangerrkit-PBMC-vignette-knitr-2.0.0.pdf>.
- 574 15. Gu Z, Eils R, Schlesner M. Complex heatmaps reveal patterns and correlations in  
575 multidimensional genomic data. *Bioinformatics*. 2016;32(18):2847-9.

- 576 16. Hintze JL, Nelson, R. D. Violin Plots: A Box Plot-Density Trace Synergism. The  
577 American Statistician. 1998;52(2):181-4.
- 578 17. Basheer F, Rasighaemi P, Liongue C, Ward AC. Zebrafish Granulocyte Colony-  
579 Stimulating Factor Receptor Maintains Neutrophil Number and Function throughout the Life  
580 Span. Infect Immun. 2019;87(2):e00793-18.
- 581 18. Hartl D, Krauss-Etschmann S, Koller B, Hordijk PL, Kuijpers TW, Hoffmann F, et al.  
582 Infiltrated neutrophils acquire novel chemokine receptor expression and chemokine  
583 responsiveness in chronic inflammatory lung diseases. J Immunol. 2008;181(11):8053-67.
- 584 19. Sokol CL, Luster AD. The chemokine system in innate immunity. Cold Spring Harb  
585 Perspect Biol. 2015;7(5):a016303.
- 586 20. Tang BM, Shojaei M, Teoh S, Meyers A, Ho J, Ball TB, et al. Neutrophils-related host  
587 factors associated with severe disease and fatality in patients with influenza infection. Nat  
588 Commun. 2019;10(1):3422.
- 589 21. El Amri M, Fitzgerald U, Schlosser G. MARCKS and MARCKS-like proteins in  
590 development and regeneration. J Biomed Sci. 2018;25(1):43.
- 591 22. Sheats MK, Pescosolido KC, Hefner EM, Sung EJ, Adler KB, Jones SL. Myristoylated  
592 Alanine Rich C Kinase Substrate (MARCKS) is essential to beta2-integrin dependent responses  
593 of equine neutrophils. Vet Immunol Immunopathol. 2014;160(3-4):167-76.
- 594 23. Sinha P, Okoro C, Foell D, Freeze HH, Ostrand-Rosenberg S, Srikrishna G.  
595 Proinflammatory S100 proteins regulate the accumulation of myeloid-derived suppressor cells. J  
596 Immunol. 2008;181(7):4666-75.

- 597 24. Yang J, Anholts J, Kolbe U, Stegehuis-Kamp JA, Claas FHJ, Eikmans M. Calcium-  
598 Binding Proteins S100A8 and S100A9: Investigation of Their Immune Regulatory Effect in  
599 Myeloid Cells. *Int J Mol Sci.* 2018;19(7):1833.
- 600 25. Uhel F, Azzaoui I, Gregoire M, Pangault C, Dulong J, Tadie JM, et al. Early Expansion  
601 of Circulating Granulocytic Myeloid-derived Suppressor Cells Predicts Development of  
602 Nosocomial Infections in Patients with Sepsis. *Am J Respir Crit Care Med.* 2017;196(3):315-27.
- 603 26. Taleb K, Auffray C, Villefroy P, Pereira A, Hosmalin A, Gaudry M, et al. Chronic Type I  
604 IFN Is Sufficient To Promote Immunosuppression through Accumulation of Myeloid-Derived  
605 Suppressor Cells. *J Immunol.* 2017;198(3):1156-63.
- 606 27. van der Pouw Kraan TC, Wijbrandts CA, van Baarsen LG, Voskuyl AE, Rustenburg F,  
607 Baggen JM, et al. Rheumatoid arthritis subtypes identified by genomic profiling of peripheral  
608 blood cells: assignment of a type I interferon signature in a subpopulation of patients. *Ann*  
609 *Rheum Dis.* 2007;66(8):1008-14.
- 610 28. Hassan M, Raslan HM, Eldin HG, Mahmoud E, Elwajed HAA. CD33(+) HLA-DR(-)  
611 Myeloid-Derived Suppressor Cells Are Increased in Frequency in the Peripheral Blood of Type 1  
612 Diabetes Patients with Predominance of CD14(+) Subset. *Open Access Maced J Med Sci.*  
613 2018;6(2):303-9.
- 614 29. Okano S, Abu-Elmagd K, Kish DD, Keslar K, Baldwin WM, 3rd, Fairchild RL, et al.  
615 Myeloid-derived suppressor cells increase and inhibit donor-reactive T cell responses to graft  
616 intestinal epithelium in intestinal transplant patients. *Am J Transplant.* 2018;18(10):2544-58.
- 617 30. Martin P, Palmer G, Vigne S, Lamacchia C, Rodriguez E, Talabot-Ayer D, et al. Mouse  
618 neutrophils express the decoy type 2 interleukin-1 receptor (IL-1R2) constitutively and in acute  
619 inflammatory conditions. *J Leukoc Biol.* 2013;94(4):791-802.

- 620 31. Shimizu K, Nakajima A, Sudo K, Liu Y, Mizoroki A, Ikarashi T, et al. IL-1 receptor type  
621 2 suppresses collagen-induced arthritis by inhibiting IL-1 signal on macrophages. *J Immunol.*  
622 2015;194(7):3156-68.
- 623 32. Abboud S, Haile DJ. A novel mammalian iron-regulated protein involved in intracellular  
624 iron metabolism. *J Biol Chem.* 2000;275(26):19906-12.
- 625 33. Eash KJ, Greenbaum AM, Gopalan PK, Link DC. CXCR2 and CXCR4 antagonistically  
626 regulate neutrophil trafficking from murine bone marrow. *J Clin Invest.* 2010;120(7):2423-31.
- 627 34. Manley HR, Keightley MC, Lieschke GJ. The Neutrophil Nucleus: An Important  
628 Influence on Neutrophil Migration and Function. *Front Immunol.* 2018;9:2867.
- 629 35. Shin JW, Spinler KR, Swift J, Chasis JA, Mohandas N, Discher DE. Lamins regulate cell  
630 trafficking and lineage maturation of adult human hematopoietic cells. *Proc Natl Acad Sci U S*  
631 *A.* 2013;110(47):18892-7.
- 632 36. Ouzounova M, Lee E, Piranlioglu R, El Andaloussi A, Kolhe R, Demirci MF, et al.  
633 Monocytic and granulocytic myeloid derived suppressor cells differentially regulate  
634 spatiotemporal tumour plasticity during metastatic cascade. *Nat Commun.* 2017;8:14979.
- 635 37. Goulart MR, Hlavaty SI, Chang YM, Polton G, Stell A, Perry J, et al. Phenotypic and  
636 transcriptomic characterization of canine myeloid-derived suppressor cells. *Sci Rep.*  
637 2019;9(1):3574.
- 638 38. Cormier SA, Yuan S, Crosby JR, Protheroe CA, Dimina DM, Hines EM, et al. T(H)2-  
639 mediated pulmonary inflammation leads to the differential expression of ribonuclease genes by  
640 alveolar macrophages. *Am J Respir Cell Mol Biol.* 2002;27(6):678-87.

- 641 39. Bosurgi L, Cao YG, Cabeza-Cabrerizo M, Tucci A, Hughes LD, Kong Y, et al.  
642 Macrophage function in tissue repair and remodeling requires IL-4 or IL-13 with apoptotic cells.  
643 Science. 2017;356(6342):1072-6.
- 644 40. Long EK, Hellberg K, Foncea R, Hertzell AV, Suttles J, Bernlohr DA. Fatty acids induce  
645 leukotriene C4 synthesis in macrophages in a fatty acid binding protein-dependent manner.  
646 Biochim Biophys Acta. 2013;1831(7):1199-207.
- 647 41. Schachtrup C, Scholzen TE, Grau V, Luger TA, Sorg C, Spener F, et al. L-FABP is  
648 exclusively expressed in alveolar macrophages within the myeloid lineage: evidence for a  
649 PPARalpha-independent expression. Int J Biochem Cell Biol. 2004;36(10):2042-53.
- 650 42. Gibbings SL, Thomas SM, Atif SM, McCubbrey AL, Desch AN, Danhorn T, et al. Three  
651 Unique Interstitial Macrophages in the Murine Lung at Steady State. Am J Respir Cell Mol Biol.  
652 2017;57(1):66-76.
- 653 43. Zuo Y, d'Aigle J, Chauhan A, Frost JA. Genetic deletion of the Rho GEF Net1 impairs  
654 mouse macrophage motility and actin cytoskeletal organization. Small GTPases. 2017:1-8.
- 655 44. Wojcik AJ, Skafien MD, Srinivasan S, Hedrick CC. A critical role for ABCG1 in  
656 macrophage inflammation and lung homeostasis. J Immunol. 2008;180(6):4273-82.
- 657 45. Shayman JA, Tesmer JJG. Lysosomal phospholipase A2. Biochim Biophys Acta Mol  
658 Cell Biol Lipids. 2019;1864(6):932-40.
- 659 46. Abe A, Hiraoka M, Wild S, Wilcoxon SE, Paine R, 3rd, Shayman JA. Lysosomal  
660 phospholipase A2 is selectively expressed in alveolar macrophages. J Biol Chem.  
661 2004;279(41):42605-11.

- 662 47. Zhou Y, Do DC, Ishmael FT, Squadrito ML, Tang HM, Tang HL, et al. Mannose  
663 receptor modulates macrophage polarization and allergic inflammation through miR-511-3p. *J*  
664 *Allergy Clin Immunol.* 2018;141(1):350-64 e8.
- 665 48. Li D, Duan M, Feng Y, Geng L, Li X, Zhang W. MiR-146a modulates macrophage  
666 polarization in systemic juvenile idiopathic arthritis by targeting INHBA. *Mol Immunol.*  
667 2016;77:205-12.
- 668 49. Morse C, Tabib T, Sembrat J, Buschur KL, Bittar HT, Valenzi E, et al. Proliferating  
669 SPP1/MERTK-expressing macrophages in idiopathic pulmonary fibrosis. *Eur Respir J.*  
670 2019;54(2):1802441.
- 671 50. Naito Y, Takagi T, Higashimura Y. Heme oxygenase-1 and anti-inflammatory M2  
672 macrophages. *Arch Biochem Biophys.* 2014;564:83-8.
- 673 51. Patsalos A, Tzerpos P, Halasz L, Nagy G, Pap A, Giannakis N, et al. The BACH1-  
674 HMOX1 Regulatory Axis Is Indispensable for Proper Macrophage Subtype Specification and  
675 Skeletal Muscle Regeneration. *J Immunol.* 2019;203(6):1532-47.
- 676 52. Wammers M, Schupp AK, Bode JG, Ehrling C, Wolf S, Deenen R, et al. Reprogramming  
677 of pro-inflammatory human macrophages to an anti-inflammatory phenotype by bile acids. *Sci*  
678 *Rep.* 2018;8(1):255.
- 679 53. Kusuyama J, Komorizono A, Bandow K, Ohnishi T, Matsuguchi T. CXCL3 positively  
680 regulates adipogenic differentiation. *J Lipid Res.* 2016;57(10):1806-20.
- 681 54. Szondy Z, Sarang Z, Molnar P, Nemeth T, Piacentini M, Mastroberardino PG, et al.  
682 Transglutaminase 2<sup>-/-</sup> mice reveal a phagocytosis-associated crosstalk between macrophages and  
683 apoptotic cells. *Proc Natl Acad Sci U S A.* 2003;100(13):7812-7.

- 684 55. Toth B, Garabuczi E, Sarang Z, Vereb G, Vamosi G, Aeschlimann D, et al.  
685 Transglutaminase 2 is needed for the formation of an efficient phagocyte portal in macrophages  
686 engulfing apoptotic cells. *J Immunol.* 2009;182(4):2084-92.
- 687 56. Yu X, Buttgereit A, Lelios I, Utz SG, Cansever D, Becher B, et al. The Cytokine TGF-  
688 beta Promotes the Development and Homeostasis of Alveolar Macrophages. *Immunity.*  
689 2017;47(5):903-12 e4.
- 690 57. Lavin Y, Winter D, Blecher-Gonen R, David E, Keren-Shaul H, Merad M, et al. Tissue-  
691 resident macrophage enhancer landscapes are shaped by the local microenvironment. *Cell.*  
692 2014;159(6):1312-26.
- 693 58. Baitsch D, Bock HH, Engel T, Telgmann R, Muller-Tidow C, Varga G, et al.  
694 Apolipoprotein E induces antiinflammatory phenotype in macrophages. *Arterioscler Thromb*  
695 *Vasc Biol.* 2011;31(5):1160-8.
- 696 59. Zmijewski JW, Banerjee S, Abraham E. S-glutathionylation of the Rpn2 regulatory  
697 subunit inhibits 26 S proteasomal function. *J Biol Chem.* 2009;284(33):22213-21.
- 698 60. Chen G, Tan CS, Teh BK, Lu J. Molecular mechanisms for synchronized transcription of  
699 three complement C1q subunit genes in dendritic cells and macrophages. *J Biol Chem.*  
700 2011;286(40):34941-50.
- 701 61. Verneret M, Tacnet-Delorme P, Osman R, Awad R, Grichine A, Kleman JP, et al.  
702 Relative contribution of c1q and apoptotic cell-surface calreticulin to macrophage phagocytosis.  
703 *J Innate Immun.* 2014;6(4):426-34.
- 704 62. Osman R, Tacnet-Delorme P, Kleman JP, Millet A, Frachet P. Calreticulin Release at an  
705 Early Stage of Death Modulates the Clearance by Macrophages of Apoptotic Cells. *Front*  
706 *Immunol.* 2017;8:1034.



- 707 63. Mould KJ, Jackson ND, Henson PM, Seibold M, Janssen WJ. Single cell RNA  
708 sequencing identifies unique inflammatory airspace macrophage subsets. *JCI Insight*.  
709 2019;4(5):e126556.
- 710 64. Nuncia-Cantarero M, Martinez-Canales S, Andres-Pretel F, Santpere G, Ocana A, Galan-  
711 Moya EM. Functional transcriptomic annotation and protein-protein interaction network analysis  
712 identify NEK2, BIRC5, and TOP2A as potential targets in obese patients with luminal A breast  
713 cancer. *Breast Cancer Res Treat*. 2018;168(3):613-23.
- 714 65. Tang-Huau TL, Gueguen P, Goudot C, Durand M, Bohec M, Baulande S, et al. Human in  
715 vivo-generated monocyte-derived dendritic cells and macrophages cross-present antigens  
716 through a vacuolar pathway. *Nat Commun*. 2018;9(1):2570.
- 717 66. Porrello A, Leslie PL, Harrison EB, Gorentla BK, Kattula S, Ghosh SK, et al. Factor  
718 XIIIa-expressing inflammatory monocytes promote lung squamous cancer through fibrin cross-  
719 linking. *Nat Commun*. 2018;9(1):1988.
- 720 67. Briseno CG, Haldar M, Kretzer NM, Wu X, Theisen DJ, Kc W, et al. Distinct  
721 Transcriptional Programs Control Cross-Priming in Classical and Monocyte-Derived Dendritic  
722 Cells. *Cell Rep*. 2016;15(11):2462-74.
- 723 68. Sanyal R, Polyak MJ, Zuccolo J, Puri M, Deng L, Roberts L, et al. MS4A4A: a novel cell  
724 surface marker for M2 macrophages and plasma cells. *Immunol Cell Biol*. 2017;95(7):611-9.
- 725 69. Hey YY, O'Neill TJ, O'Neill HC. A novel myeloid cell in murine spleen defined through  
726 gene profiling. *J Cell Mol Med*. 2019;23(8):5128-43.
- 727 70. Segawa S, Kondo Y, Nakai Y, Iizuka A, Kaneko S, Yokosawa M, et al. Placenta Specific  
728 8 Suppresses IL-18 Production through Regulation of Autophagy and Is Associated with Adult  
729 Still Disease. *J Immunol*. 2018;201(12):3534-45.

- 730 71. Kuroda N, Masuya M, Tawara I, Tsuboi J, Yoneda M, Nishikawa K, et al. Infiltrating  
731 CCR2(+) monocytes and their progenies, fibrocytes, contribute to colon fibrosis by inhibiting  
732 collagen degradation through the production of TIMP-1. *Sci Rep.* 2019;9(1):8568.
- 733 72. Lim JK, Obara CJ, Rivollier A, Pletnev AG, Kelsall BL, Murphy PM. Chemokine  
734 receptor Ccr2 is critical for monocyte accumulation and survival in West Nile virus encephalitis.  
735 *J Immunol.* 2011;186(1):471-8.
- 736 73. Coates BM, Staricha KL, Koch CM, Cheng Y, Shumaker DK, Budinger GRS, et al.  
737 Inflammatory Monocytes Drive Influenza A Virus-Mediated Lung Injury in Juvenile Mice. *J*  
738 *Immunol.* 2018;200(7):2391-404.
- 739 74. Bajpai G, Bredemeyer A, Li W, Zaitsev K, Koenig AL, Lokshina I, et al. Tissue Resident  
740 CCR2- and CCR2+ Cardiac Macrophages Differentially Orchestrate Monocyte Recruitment and  
741 Fate Specification Following Myocardial Injury. *Circ Res.* 2019;124(2):263-78.
- 742 75. Blasius AL, Cella M, Maldonado J, Takai T, Colonna M. Siglec-H is an IPC-specific  
743 receptor that modulates type I IFN secretion through DAP12. *Blood.* 2006;107(6):2474-6.
- 744 76. Zhang J, Raper A, Sugita N, Hingorani R, Salio M, Palmowski MJ, et al.  
745 Characterization of Siglec-H as a novel endocytic receptor expressed on murine plasmacytoid  
746 dendritic cell precursors. *Blood.* 2006;107(9):3600-8.
- 747 77. Grajkowska LT, Ceribelli M, Lau CM, Warren ME, Tiniakou I, Nakandakari Higa S, et  
748 al. Isoform-Specific Expression and Feedback Regulation of E Protein TCF4 Control Dendritic  
749 Cell Lineage Specification. *Immunity.* 2017;46(1):65-77.
- 750 78. Gueguen C, Bouley J, Moussu H, Luce S, Duchateau M, Chamot-Rooke J, et al. Changes  
751 in markers associated with dendritic cells driving the differentiation of either TH2 cells or

- 752 regulatory T cells correlate with clinical benefit during allergen immunotherapy. *J Allergy Clin*  
753 *Immunol.* 2016;137(2):545-58.
- 754 79. Zimmermann HW, Bruns T, Weston CJ, Curbishley SM, Liaskou E, Li KK, et al.  
755 Bidirectional transendothelial migration of monocytes across hepatic sinusoidal endothelium  
756 shapes monocyte differentiation and regulates the balance between immunity and tolerance in  
757 liver. *Hepatology.* 2016;63(1):233-46.
- 758 80. Cao W, Bover L, Cho M, Wen X, Hanabuchi S, Bao M, et al. Regulation of TLR7/9  
759 responses in plasmacytoid dendritic cells by BST2 and ILT7 receptor interaction. *J Exp Med.*  
760 2009;206(7):1603-14.
- 761 81. Bego MG, Miguet N, Laliberte A, Aschman N, Gerard F, Merakos AA, et al. Activation  
762 of the ILT7 receptor and plasmacytoid dendritic cell responses are governed by structurally-  
763 distinct BST2 determinants. *J Biol Chem.* 2019;294(27):10503-18.
- 764 82. Xing S, Li F, Zeng Z, Zhao Y, Yu S, Shan Q, et al. Tcf1 and Lef1 transcription factors  
765 establish CD8(+) T cell identity through intrinsic HDAC activity. *Nat Immunol.* 2016;17(6):695-  
766 703.
- 767 83. Willinger T, Freeman T, Herbert M, Hasegawa H, McMichael AJ, Callan MF. Human  
768 naive CD8 T cells down-regulate expression of the WNT pathway transcription factors lymphoid  
769 enhancer binding factor 1 and transcription factor 7 (T cell factor-1) following antigen encounter  
770 in vitro and in vivo. *J Immunol.* 2006;176(3):1439-46.
- 771 84. Maier E, Hebenstreit D, Posselt G, Hammerl P, Duschl A, Horejs-Hoeck J. Inhibition of  
772 suppressive T cell factor 1 (TCF-1) isoforms in naive CD4+ T cells is mediated by IL-4/STAT6  
773 signaling. *J Biol Chem.* 2011;286(2):919-28.

- 774 85. Doucey MA, Goffin L, Naeher D, Michielin O, Baumgartner P, Guillaume P, et al. CD3  
775 delta establishes a functional link between the T cell receptor and CD8. *J Biol Chem*.  
776 2003;278(5):3257-64.
- 777 86. Borroto A, Lama J, Niedergang F, Dautry-Varsat A, Alarcon B, Alcover A. The CD3  
778 epsilon subunit of the TCR contains endocytosis signals. *J Immunol*. 1999;163(1):25-31.
- 779 87. Nechanitzky R, Akbas D, Scherer S, Gyory I, Hoyler T, Ramamoorthy S, et al.  
780 Transcription factor EBF1 is essential for the maintenance of B cell identity and prevention of  
781 alternative fates in committed cells. *Nat Immunol*. 2013;14(8):867-75.
- 782 88. Luisiri P, Lee YJ, Eisfelder BJ, Clark MR. Cooperativity and segregation of function  
783 within the Ig-alpha/beta heterodimer of the B cell antigen receptor complex. *J Biol Chem*.  
784 1996;271(9):5158-63.
- 785 89. Tedder TF, Streuli M, Schlossman SF, Saito H. Isolation and structure of a cDNA  
786 encoding the B1 (CD20) cell-surface antigen of human B lymphocytes. *Proc Natl Acad Sci U S*  
787 *A*. 1988;85(1):208-12.
- 788 90. McHeyzer-Williams M, Okitsu S, Wang N, McHeyzer-Williams L. Molecular  
789 programming of B cell memory. *Nat Rev Immunol*. 2011;12(1):24-34.
- 790 91. Sheppard S, Schuster IS, Andoniou CE, Cocita C, Adejumo T, Kung SKP, et al. The  
791 Murine Natural Cytotoxic Receptor NKp46/NCR1 Controls TRAIL Protein Expression in NK  
792 Cells and ILC1s. *Cell Rep*. 2018;22(13):3385-92.
- 793 92. Bottcher JP, Bonavita E, Chakravarty P, Brees H, Cabeza-Cabrerizo M, Sammicheli S, et  
794 al. NK Cells Stimulate Recruitment of cDC1 into the Tumor Microenvironment Promoting  
795 Cancer Immune Control. *Cell*. 2018;172(5):1022-37 e14.

- 796 93. Bade B, Boettcher HE, Lohrmann J, Hink-Schauer C, Bratke K, Jenne DE, et al.  
797 Differential expression of the granzymes A, K and M and perforin in human peripheral blood  
798 lymphocytes. *Int Immunol.* 2005;17(11):1419-28.
- 799 94. Pardo J, Balkow S, Anel A, Simon MM. Granzymes are essential for natural killer cell-  
800 mediated and perf-facilitated tumor control. *Eur J Immunol.* 2002;32(10):2881-7.
- 801 95. Turman MA, Yabe T, McSherry C, Bach FH, Houchins JP. Characterization of a novel  
802 gene (NKG7) on human chromosome 19 that is expressed in natural killer cells and T cells. *Hum*  
803 *Immunol.* 1993;36(1):34-40.
- 804 96. Medley QG, Kedersha N, O'Brien S, Tian Q, Schlossman SF, Streuli M, et al.  
805 Characterization of GMP-17, a granule membrane protein that moves to the plasma membrane of  
806 natural killer cells following target cell recognition. *Proc Natl Acad Sci U S A.* 1996;93(2):685-  
807 9.
- 808 97. Poole JA, Gleason AM, Bauer C, West WW, Alexis N, van Rooijen N, et al.  
809 CD11c(+)/CD11b(+) cells are critical for organic dust-elicited murine lung inflammation. *Am J*  
810 *Respir Cell Mol Biol.* 2012;47(5):652-9.
- 811 98. Bronte V, Brandau S, Chen SH, Colombo MP, Frey AB, Greten TF, et al.  
812 Recommendations for myeloid-derived suppressor cell nomenclature and characterization  
813 standards. *Nat Commun.* 2016;7:12150.
- 814 99. Damuzzo V, Pinton L, Desantis G, Solito S, Marigo I, Bronte V, et al. Complexity and  
815 challenges in defining myeloid-derived suppressor cells. *Cytometry B Clin Cytom.*  
816 2015;88(2):77-91.
- 817 100. Karlson EW, Deane K. Environmental and gene-environment interactions and risk of  
818 rheumatoid arthritis. *Rheum Dis Clin North Am.* 2012;38(2):405-26.

- 819 101. Murphy D, Bellis K, Hutchinson D. Vapour, gas, dust and fume occupational exposures  
820 in male patients with rheumatoid arthritis resident in Cornwall (UK) and their association with  
821 rheumatoid factor and anti-cyclic protein antibodies: a retrospective clinical study. *BMJ Open*.  
822 2018;8(5):e021754.
- 823 102. Murphy D, Bellis K, Hutchinson D. Occupational dust and cigarette smoke exposure  
824 might link rheumatoid arthritis to COPD. *Lancet Respir Med*. 2018;6(8):e36.
- 825 103. Murphy D, Hutchinson D. Is Male Rheumatoid Arthritis an Occupational Disease? A  
826 Review. *Open Rheumatol J*. 2017;11:88-105.
- 827 104. Szema AM. Occupational Lung Diseases among Soldiers Deployed to Iraq and  
828 Afghanistan. *Occup Med Health Aff*. 2013;1.
- 829 105. Poole JA, Mikuls TR, Duryee MJ, Warren KJ, Wyatt TA, Nelson AJ, et al. A role for B  
830 cells in organic dust induced lung inflammation. *Respir Res*. 2017;18(1):214.
- 831 106. Mortaz E, Alipoor SD, Adcock IM, Mumby S, Koenderman L. Update on Neutrophil  
832 Function in Severe Inflammation. *Front Immunol*. 2018;9:2171.
- 833 107. Rosales C. Neutrophil: A Cell with Many Roles in Inflammation or Several Cell Types?  
834 *Front Physiol*. 2018;9:113.
- 835 108. Tsuda Y, Takahashi H, Kobayashi M, Hanafusa T, Herndon DN, Suzuki F. Three  
836 different neutrophil subsets exhibited in mice with different susceptibilities to infection by  
837 methicillin-resistant *Staphylococcus aureus*. *Immunity*. 2004;21(2):215-26.
- 838 109. Zhu J, Chen S, Wu L, Wang R, Zheng S, Zhao D, et al. The Expansion of Myeloid-  
839 Derived Suppressor Cells Is Associated with Joint Inflammation in Rheumatic Patients with  
840 Arthritis. *Biomed Res Int*. 2018;2018:5474828.

- 841 110. Fernandez IE, Greiffo FR, Frankenberger M, Bandres J, Heinzelmann K, Neurohr C, et  
842 al. Peripheral blood myeloid-derived suppressor cells reflect disease status in idiopathic  
843 pulmonary fibrosis. *Eur Respir J*. 2016;48(4):1171-83.
- 844 111. Almand B, Clark JI, Nikitina E, van Beynen J, English NR, Knight SC, et al. Increased  
845 production of immature myeloid cells in cancer patients: a mechanism of immunosuppression in  
846 cancer. *J Immunol*. 2001;166(1):678-89.
- 847 112. Bronte V, Serafini P, Apolloni E, Zanovello P. Tumor-induced immune dysfunctions  
848 caused by myeloid suppressor cells. *J Immunother*. 2001;24(6):431-46.
- 849 113. Melani C, Chiodoni C, Forni G, Colombo MP. Myeloid cell expansion elicited by the  
850 progression of spontaneous mammary carcinomas in c-erbB-2 transgenic BALB/c mice  
851 suppresses immune reactivity. *Blood*. 2003;102(6):2138-45.
- 852 114. Ohl K, Tenbrock K. Reactive Oxygen Species as Regulators of MDSC-Mediated  
853 Immune Suppression. *Front Immunol*. 2018;9:2499.
- 854 115. Groth C, Hu X, Weber R, Fleming V, Altevogt P, Utikal J, et al. Immunosuppression  
855 mediated by myeloid-derived suppressor cells (MDSCs) during tumour progression. *Br J Cancer*.  
856 2019;120(1):16-25.
- 857 116. Sendo S, Saegusa J, Yamada H, Nishimura K, Morinobu A. Tofacitinib facilitates the  
858 expansion of myeloid-derived suppressor cells and ameliorates interstitial lung disease in SKG  
859 mice. *Arthritis Res Ther*. 2019;21(1):184.
- 860 117. Gordon S, Plueddemann A, Martinez Estrada F. Macrophage heterogeneity in tissues:  
861 phenotypic diversity and functions. *Immunol Rev*. 2014;262(1):36-55.
- 862 118. Kielbassa K, Vegna S, Ramirez C, Akkari L. Understanding the Origin and Diversity of  
863 Macrophages to Tailor Their Targeting in Solid Cancers. *Front Immunol*. 2019;10:2215.

- 864 119. Wynn TA, Vannella KM. Macrophages in Tissue Repair, Regeneration, and Fibrosis.  
865 Immunity. 2016;44(3):450-62.
- 866 120. Rawlings DJ, Metzler G, Wray-Dutra M, Jackson SW. Altered B cell signalling in  
867 autoimmunity. Nat Rev Immunol. 2017;17(7):421-36.
- 868 121. Hofmann K, Clauder AK, Manz RA. Targeting B Cells and Plasma Cells in Autoimmune  
869 Diseases. Front Immunol. 2018;9:835.
- 870 122. England BR, Duryee MJ, Roul P, Mahajan TD, Singh N, Poole JA, et al.  
871 Malondialdehyde-Acetaldehyde Adducts and Antibody Responses in Rheumatoid Arthritis-  
872 Associated Interstitial Lung Disease. Arthritis Rheumatol. 2019;71(9):1483-93.
- 873 123. Giancchetti E, Delfino DV, Fierabracci A. NK cells in autoimmune diseases: Linking  
874 innate and adaptive immune responses. Autoimmun Rev. 2018;17(2):142-54.
- 875 124. Trouw LA, Pickering MC, Blom AM. The complement system as a potential therapeutic  
876 target in rheumatic disease. Nat Rev Rheumatol. 2017;13(9):538-47.
- 877 125. Botto M, Walport MJ. C1q, autoimmunity and apoptosis. Immunobiology. 2002;205(4-  
878 5):395-406.
- 879 126. Holers VM, Banda NK. Complement in the Initiation and Evolution of Rheumatoid  
880 Arthritis. Front Immunol. 2018;9:1057.
- 881 127. Gu H, Mickler EA, Cummings OW, Sandusky GE, Weber DJ, Gracon A, et al. Crosstalk  
882 between TGF-beta1 and complement activation augments epithelial injury in pulmonary fibrosis.  
883 FASEB J. 2014;28(10):4223-34.
- 884 128. Gu H, Fisher AJ, Mickler EA, Duerson F, 3rd, Cummings OW, Peters-Golden M, et al.  
885 Contribution of the anaphylatoxin receptors, C3aR and C5aR, to the pathogenesis of pulmonary  
886 fibrosis. FASEB J. 2016;30(6):2336-50.



887 129. Okamoto T, Mathai SK, Hennessy CE, Hancock LA, Walts AD, Stefanski AL, et al. The  
888 relationship between complement C3 expression and the MUC5B genotype in pulmonary  
889 fibrosis. *Am J Physiol Lung Cell Mol Physiol*. 2018;315(1):L1-L10.

890 130. Kulkarni HS, Liszewski MK, Brody SL, Atkinson JP. The complement system in the  
891 airway epithelium: An overlooked host defense mechanism and therapeutic target? *J Allergy*  
892 *Clin Immunol*. 2018;141(5):1582-6 e1.

893

894

## 895 **Figure legends**

896

897 **Figure 1: Unsupervised single-cell transcriptional profiling of lung CD45<sup>+</sup> cells identifies 14**

898 **unique clusters among Sham, CIA, ODE, and CIA+ODE treatment groups.** Lung immune

899 cells were isolated from mice treated with Sham, CIA, ODE and CIA+ODE. **(A)** T-distributed

900 stochastic neighbor embedding (*t-SNE*) plot shows projection of unique molecular identifier (UMI)

901 count among cell clusters. **(B)** Distribution of cells by unsupervised clustering in *t-SNE* showing

902 lung immune cell populations. **(C)** Major lung cell types identified by signature genes including

903 *Csf3r* (neutrophils), *Cd11c/Itgax* (macrophages), *F13a1* (monocytes), *Trbc2* (T lymphocytes),

904 *Cd19* (B lymphocytes), *Ccl5* (NK cells), and *Siglech* (dendritic cells).

905

906 **Figure 2: Distribution of aggregated gene clusters among treatment groups.**

907 Sham, CIA, ODE and CIA+ODE treatment groups demonstrate differences in cell distribution

908 among 14 gene clusters. Sham is represented by red, CIA by green, ODE by teal, CIA+ODE by

909 blue. **(A)** All the treatment groups are merged with respective colors. **(B)** The four treatment groups

910 are individually plotted with their respective colors to show cell distribution.

911

912 **Figure 3: Neutrophil populations segregated by unsupervised clustering relate to cell-**

913 **programming among treatment groups.** **(A)** Heatmap shows the top 120/N upregulated genes

914 for 3 distinct neutrophil clusters ranked by log<sub>2</sub> fold-change, where N=total number of clusters.

915 **(B)** Top 5-10 genes of the three neutrophil clusters plotted in heatmap to show differences and

916 gene names in transcript levels. **(C)** Violin plots show expression with population distribution

917 among inflammatory neutrophils, represented by blue (cluster 8), resident/transitional neutrophils,

918 represented by green (cluster 4) and granulocytic myeloid-derived suppressor cells

919 (gMDSC)/autoreactive neutrophils, represented by red (cluster 3). The y-axis indicates normalized  
920 expression value,  $\log_2$  (average UMI count + 1). **(D)** Representative gene from each neutrophil  
921 cluster showing their distribution in t-SNE.

922

923 **Figure 4: Differences in transcript levels among monocyte-macrophages and dendritic cell**

924 **(DC) populations.** **(A)** Heatmap shows the top 120/N upregulated genes for 7  
925 macrophages/monocytes and DC clusters ranked by  $\log_2$  fold-change, where N=total number of  
926 clusters. **(B)** Heatmap showing differences among top 5 genes with gene names of the  
927 macrophages/monocytes and DC populations. **(C)** Expression levels with violin plots among  
928 airspace macrophages (red, cluster 1), differentiating/recruited macrophages (brown, cluster 2),  
929 recruited macrophages (green, cluster 5), resident/interstitial macrophages (teal, cluster 11),  
930 proliferative airspace macrophages (light blue, cluster 14), inflammatory monocytes (lavender,  
931 cluster 12), dendritic cells (pink, cluster 10). The y-axis indicates normalized expression value,  
932  $\log_2$  (average UMI count + 1). **(D)** Distribution of respective cell populations by a representative  
933 gene in t-SNE plot.

934

935 **Figure 5: Four discrete lymphocyte populations suggest heterogeneity among treatment**

936 **groups.** **(A)** Heatmap shows the top 120/N upregulated genes for 5 distinct lymphocyte clusters  
937 ranked by  $\log_2$  fold-change, where N=total number of clusters. **(B)** The top 5 genes with gene  
938 names of each lymphocyte cluster are shown in heatmap. **(C)** Violin plots show variability in  
939 transcript levels among cell populations including T lymphocytes (red, cluster 6), effector T  
940 lymphocytes (green, cluster 13), B lymphocytes (teal, cluster 7) and natural killer cells (lavender,

941 cluster 9). The y-axis indicates normalized expression value,  $\log_2$  (average UMI count + 1). **(D)**  
942 Representative genes from each cluster show their distribution in t-SNE plot.

943

944 **Figure 6: Treatment group-specific gene expression pattern demonstrated in isolated lung**

945 **neutrophils.** Neutrophils were sorted from lung digests as live, singlets, CD45<sup>+</sup>, non-lymphocytes,

946 Ly6C<sup>+</sup> and Ly6G<sup>+</sup>. **(A)** Representative dot plots of Ly6C<sup>+</sup> Ly6G<sup>+</sup> neutrophils sorted from Sham,

947 CIA, ODE and CIA+ODE treatment groups shown. **(B)** Heat map of fold-change of top 15 genes

948 normalized to 20 housekeeping genes from each treatment group compared to Sham. **(C)** Bar

949 graphs reflect the mean of normalized fold-change with standard error bars of representative genes

950 from each treatment group Sham (red), CIA (green), ODE (teal), and CIA+ODE (blue). N=3 (3

951 independent experiments with 2-3 mice pooled). \*P<0.05, \*\*P<0.01, \*\*\*P<0.001, \*\*\*\*P<0.0001.

952

953 **Figure 7: Treatment group-specific gene expression pattern demonstrated in isolated**

954 **macrophages** Three monocyte/macrophage populations were sorted from lung digests as live,

955 singlets, CD45<sup>+</sup>, non-lymphocytes, Ly6C<sup>-</sup> and Ly6G<sup>-</sup>, and identified as separate populations with

956 variable expression of CD11b and CD11c. RNA was isolated from these populations and subjected

957 to NanoString nCounter analysis. **(A)** Representative dot plots of the populations sorted as: (1)

958 macrophages (CD11c<sup>high</sup>, CD11b<sup>variable</sup>), (2) monocytes-macrophages (CD11c<sup>intermediate</sup>, CD11b<sup>high</sup>),

959 and (3) monocytes (CD11c<sup>-</sup>, CD11b<sup>high</sup>) from each treatment of Sham, CIA, ODE, and CIA+ODE

960 shown. **(B)** Heat map of fold-change of top 15 genes normalized to 20 housekeeping genes from

961 each treatment group compared to Sham. **(C)** Bar graphs depict mean with standard error bars of

962 representative genes from each treatment group Sham (red), CIA (green), ODE (teal), and

963 CIA+ODE (blue). N=3 (3 independent experiments with 2-3 mice pooled). \*P<0.05, \*\*P<0.01,  
964 \*\*\*P<0.001, \*\*\*\*P<0.0001.

965

966 **Figure 8: Treatment group-specific gene expression pattern demonstrated is isolated**  
967 **monocyte-macrophage population.** Monocytes-macrophages were sorted as  
968 CD11c<sup>intermediate</sup>,CD11b<sup>high</sup>. (A) Heat map of fold-change of top 15 genes/treatment group (CIA,  
969 ODE and CIA+ODE) normalized to 20 housekeeping genes compared to Sham. (B) Bar graphs of  
970 mean with standard error bars of representative genes from each treatment group Sham (red), CIA  
971 (green), ODE (teal), and CIA+ODE (blue). N=3 (3 independent experiments with 2-3 mice  
972 pooled). \*\*\*P<0.001, \*\*\*\*P<0.0001.

973

974 **Figure 9: Treatment group-specific gene expression pattern. Demonstrated in isolated**  
975 **monocytes.** Monocytes were sorted as CD11c<sup>-</sup>, CD11b<sup>high</sup>. (A) Heat map of fold-change of top 15  
976 genes/treatment group (CIA, ODE and CIA+ODE) normalized to 20 housekeeping genes  
977 compared to Sham. (B) Bar graphs depict mean with standard error bars of representative genes  
978 from each treatment group Sham (red), CIA (green), ODE (teal), and CIA+ODE (blue). Two-way  
979 ANOVA, \*P<0.05, \*\*\*\*P<0.0001.

980

981 **Figure 10: Differences in myeloid-derived suppressor cells (MDSCs) identified in posthoc**  
982 **analysis among treatment groups.** (A) Dot plots show differences in CD45<sup>+</sup> Ly6C<sup>+</sup> Ly6G<sup>+</sup>  
983 CD11b<sup>+</sup> SSC<sup>high</sup> granulocytic (g) MDSCs among treatment groups. (B) Bar graph depicts mean  
984 with standard error bars of the ratio change in gMDSCs as normalized to Sham (percentile of  
985 gMDSC treatment group divided by percentile of gMDSC Sham group). (C) Dot plots show

986 differences in CD45<sup>+</sup> Ly6G<sup>-</sup> CD11b<sup>+</sup> Ly6C<sup>+</sup> SSC<sup>low</sup> monocytic (m) MDSCs among treatment  
987 groups. **(D)** Bar graph depicts mean with standard error bars of the ratio change in mMDSCs as  
988 normalized to Sham (percentile of mMDSC treatment group divided by percentile of mMDSC  
989 Sham group). N=3 (3 independent experiments with 2-3 mice pooled).

990

991 **S1 Figure: Gating strategy for FACS-based population isolation.** Neutrophils were sorted from  
992 lung digests as live, singlets, CD45<sup>+</sup>, non-lymphocytes, Ly6C<sup>+</sup> and Ly6G<sup>+</sup>. Three  
993 monocyte/macrophage populations were sorted from lung digests as live, singlets, CD45<sup>+</sup>, non-  
994 lymphocytes, Ly6C<sup>-</sup> and Ly6G<sup>-</sup>, and identified as separate populations with variable expression of  
995 CD11b and CD11c as: (1) macrophages (CD11c<sup>high</sup>, CD11b<sup>variable</sup>), (2) monocytes-macrophages  
996 (CD11c<sup>intermediate</sup>, CD11b<sup>high</sup>), and (3) monocytes (CD11c<sup>-</sup>, CD11b<sup>high</sup>).

997

998 **S2 Figure: Gating strategy for posthoc analysis of myeloid-derived suppressor cells**  
999 **(MDSCs).** Granulocytic (g) MDSCs were identified as live, singlets, CD45<sup>+</sup>, non-lymphocytes  
1000 that were Ly6C<sup>+</sup> Ly6G<sup>+</sup> CD11b<sup>+</sup> SSC<sup>high</sup>. Whereas, monocytic (m) MDSCs were identified as live,  
1001 singlets, CD45<sup>+</sup>, non-lymphocytes that were Ly6G<sup>-</sup> CD11b<sup>+</sup> Ly6C<sup>+</sup> SSC<sup>low</sup>.

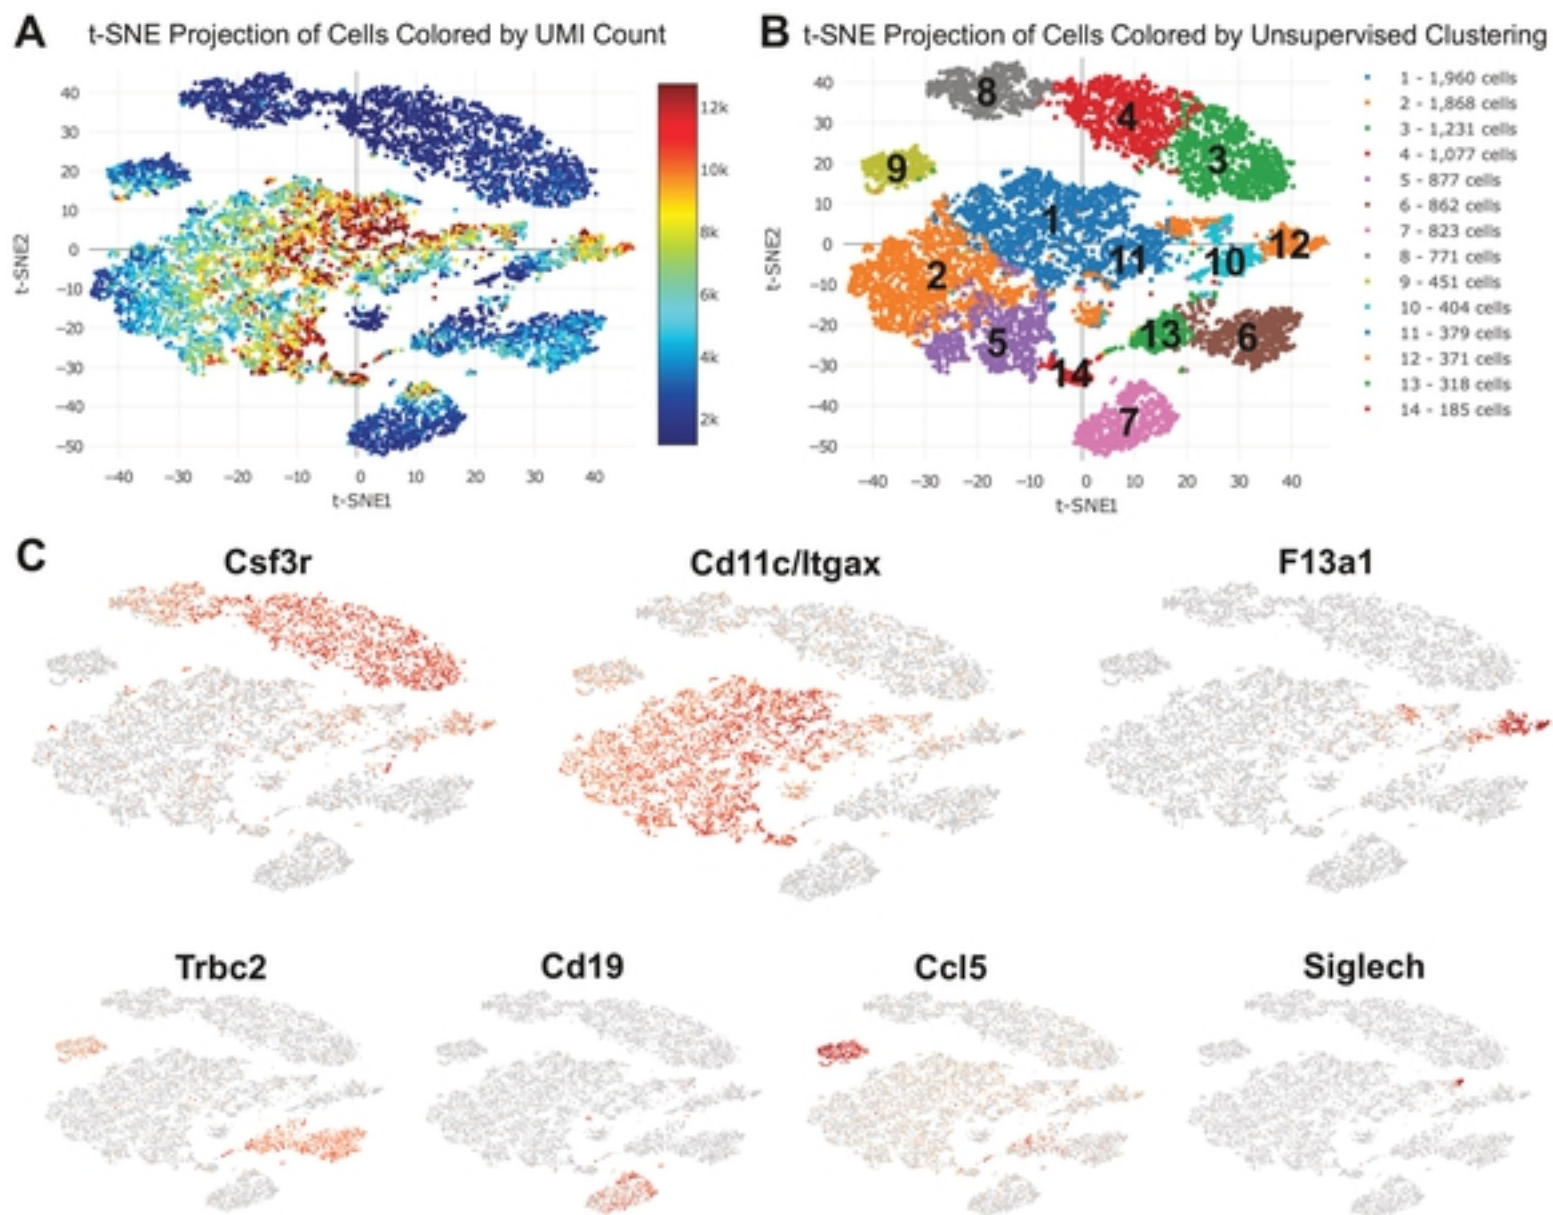

Figure 1

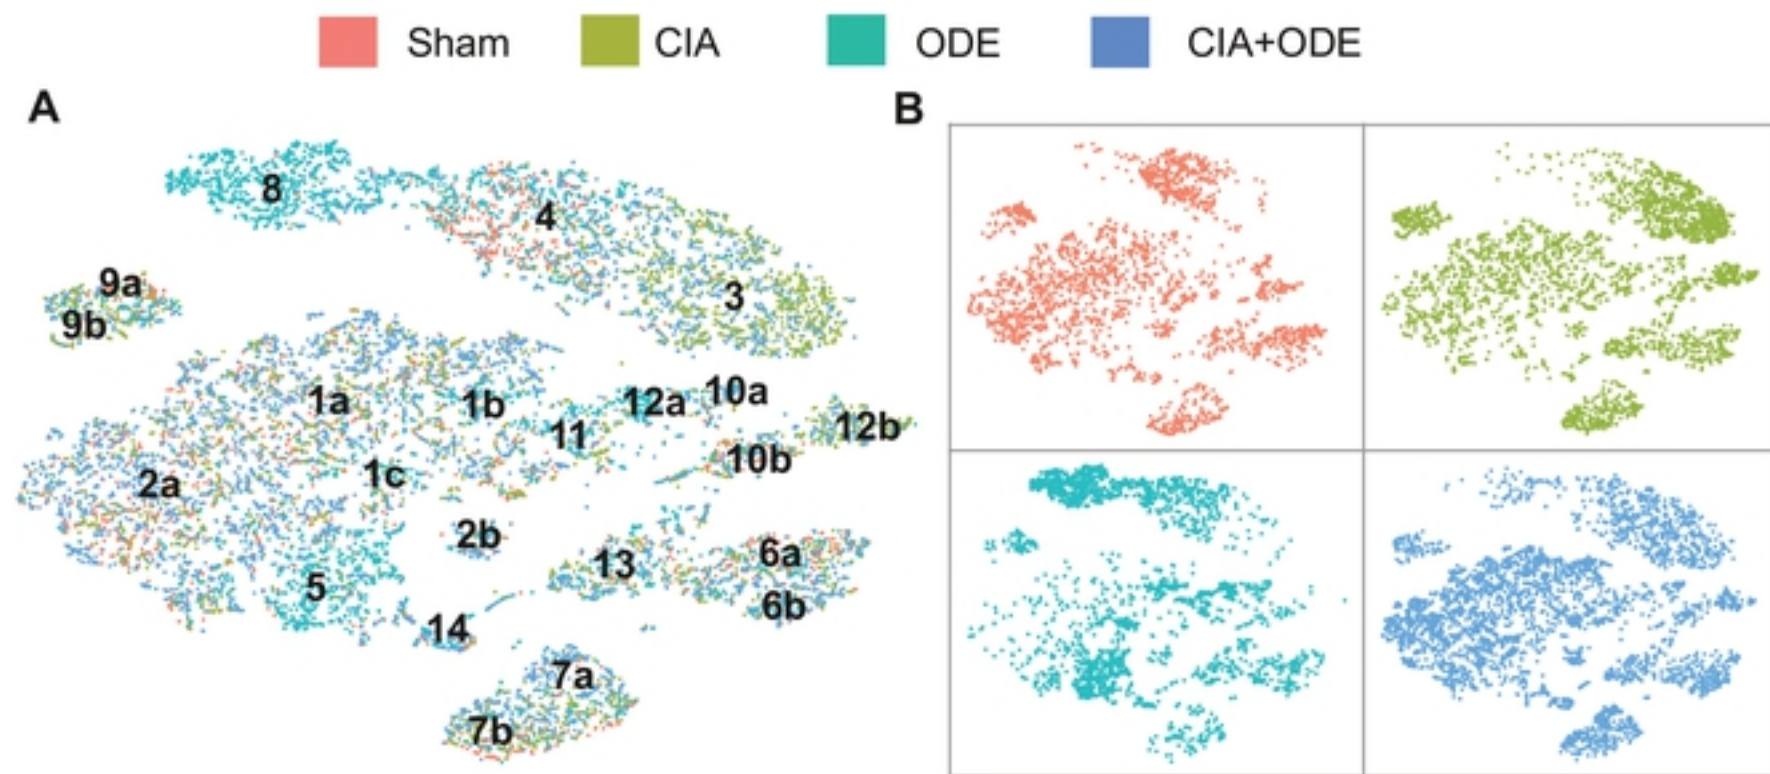

Figure 2



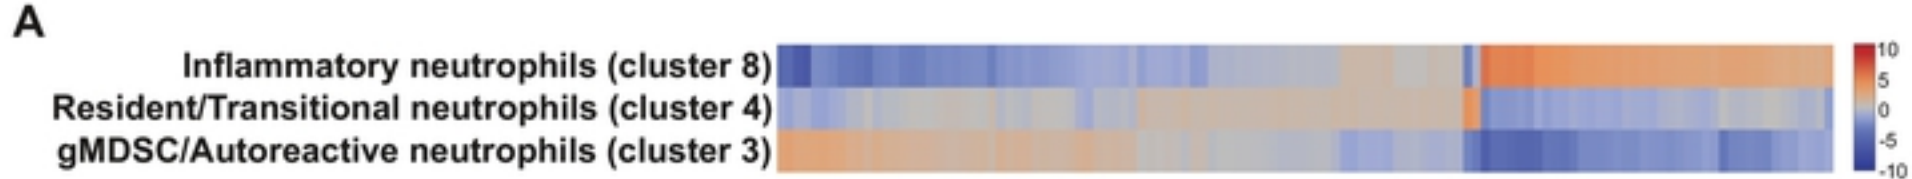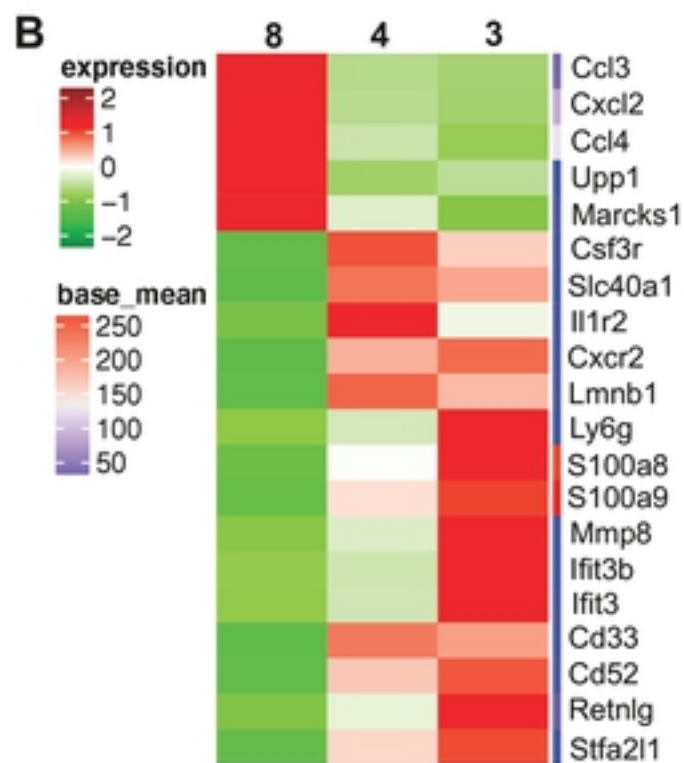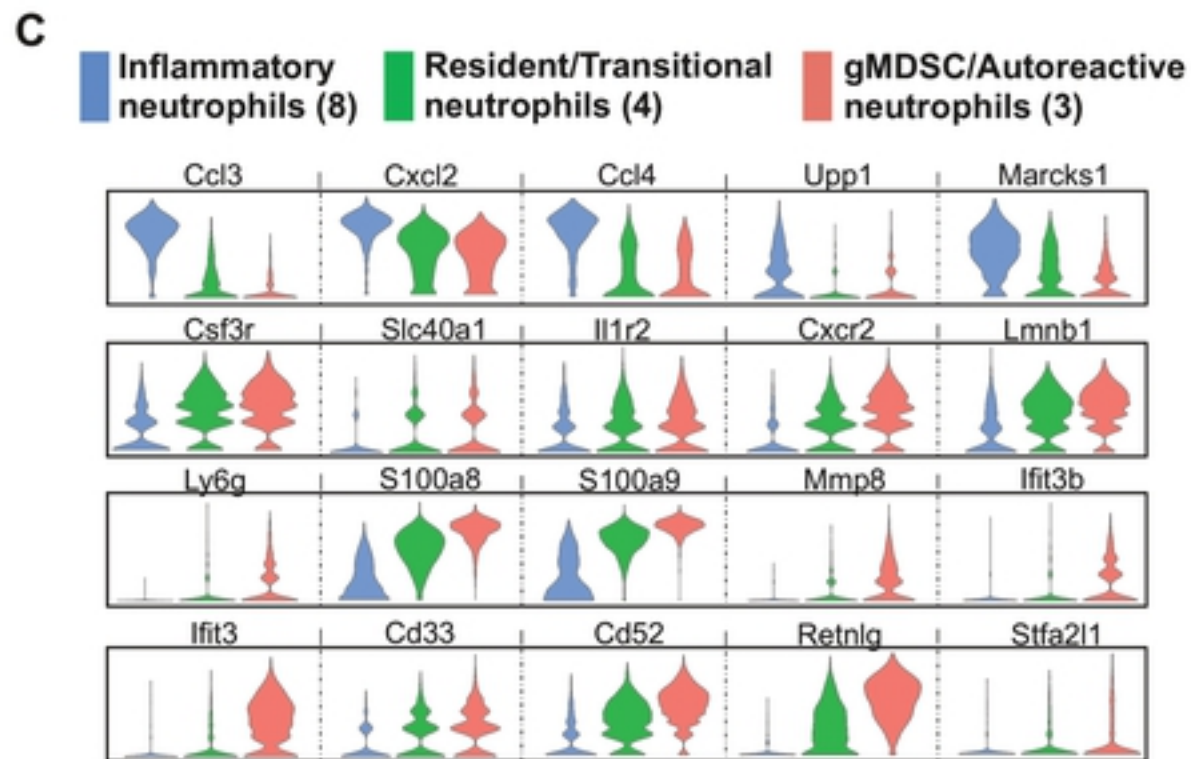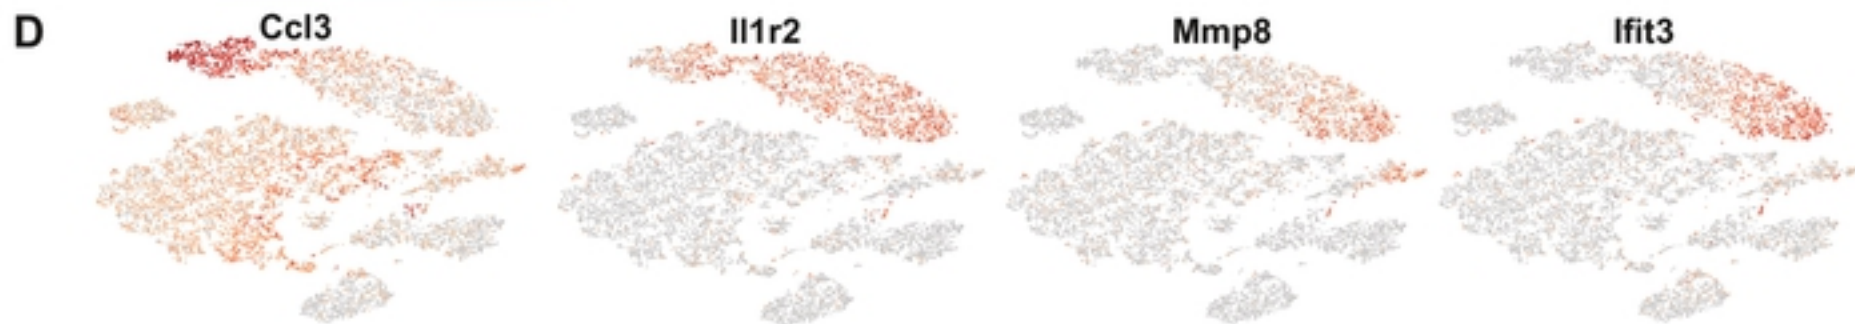

Figure 3

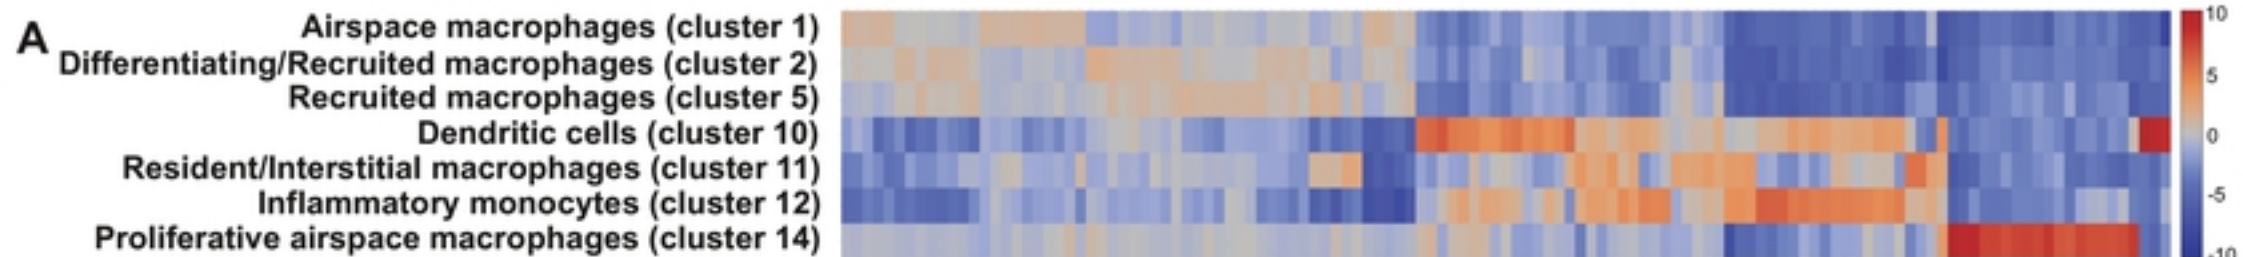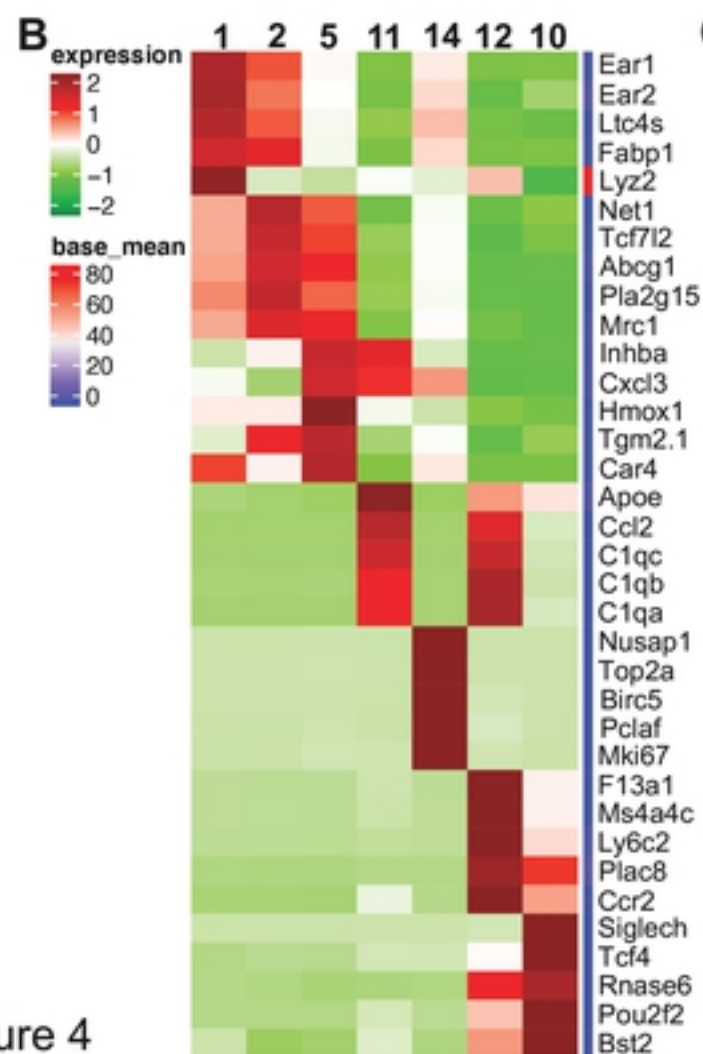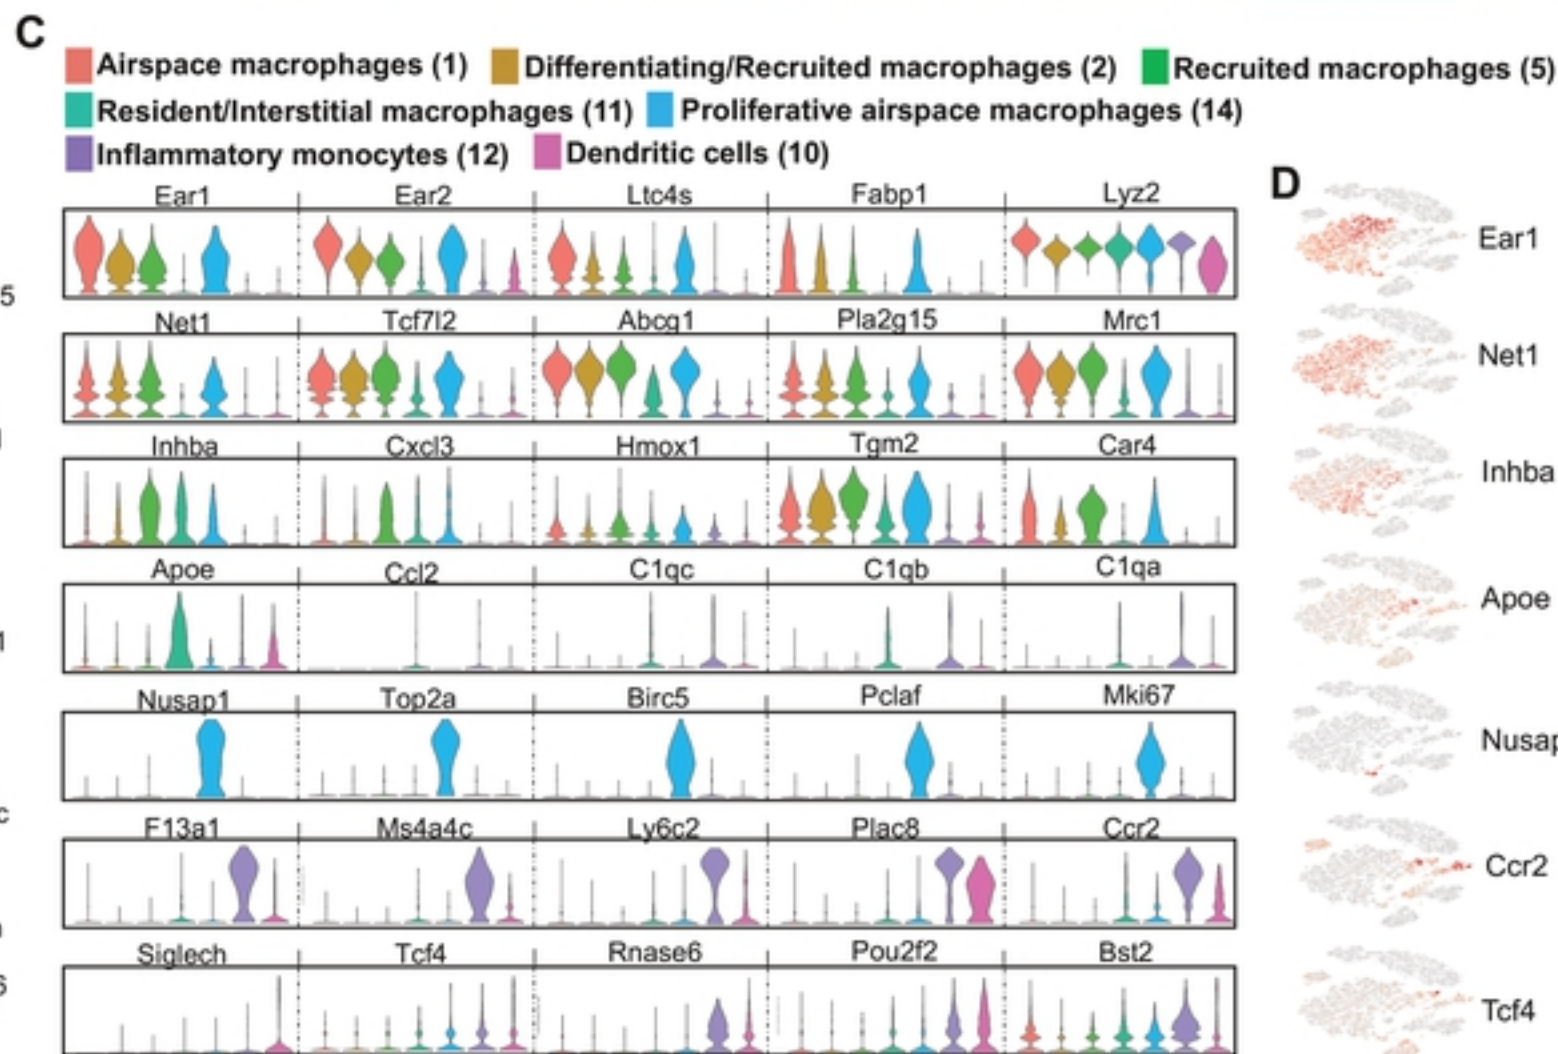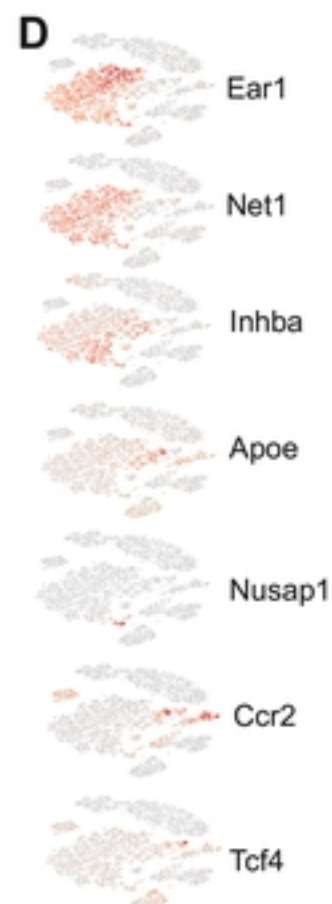

Figure 4

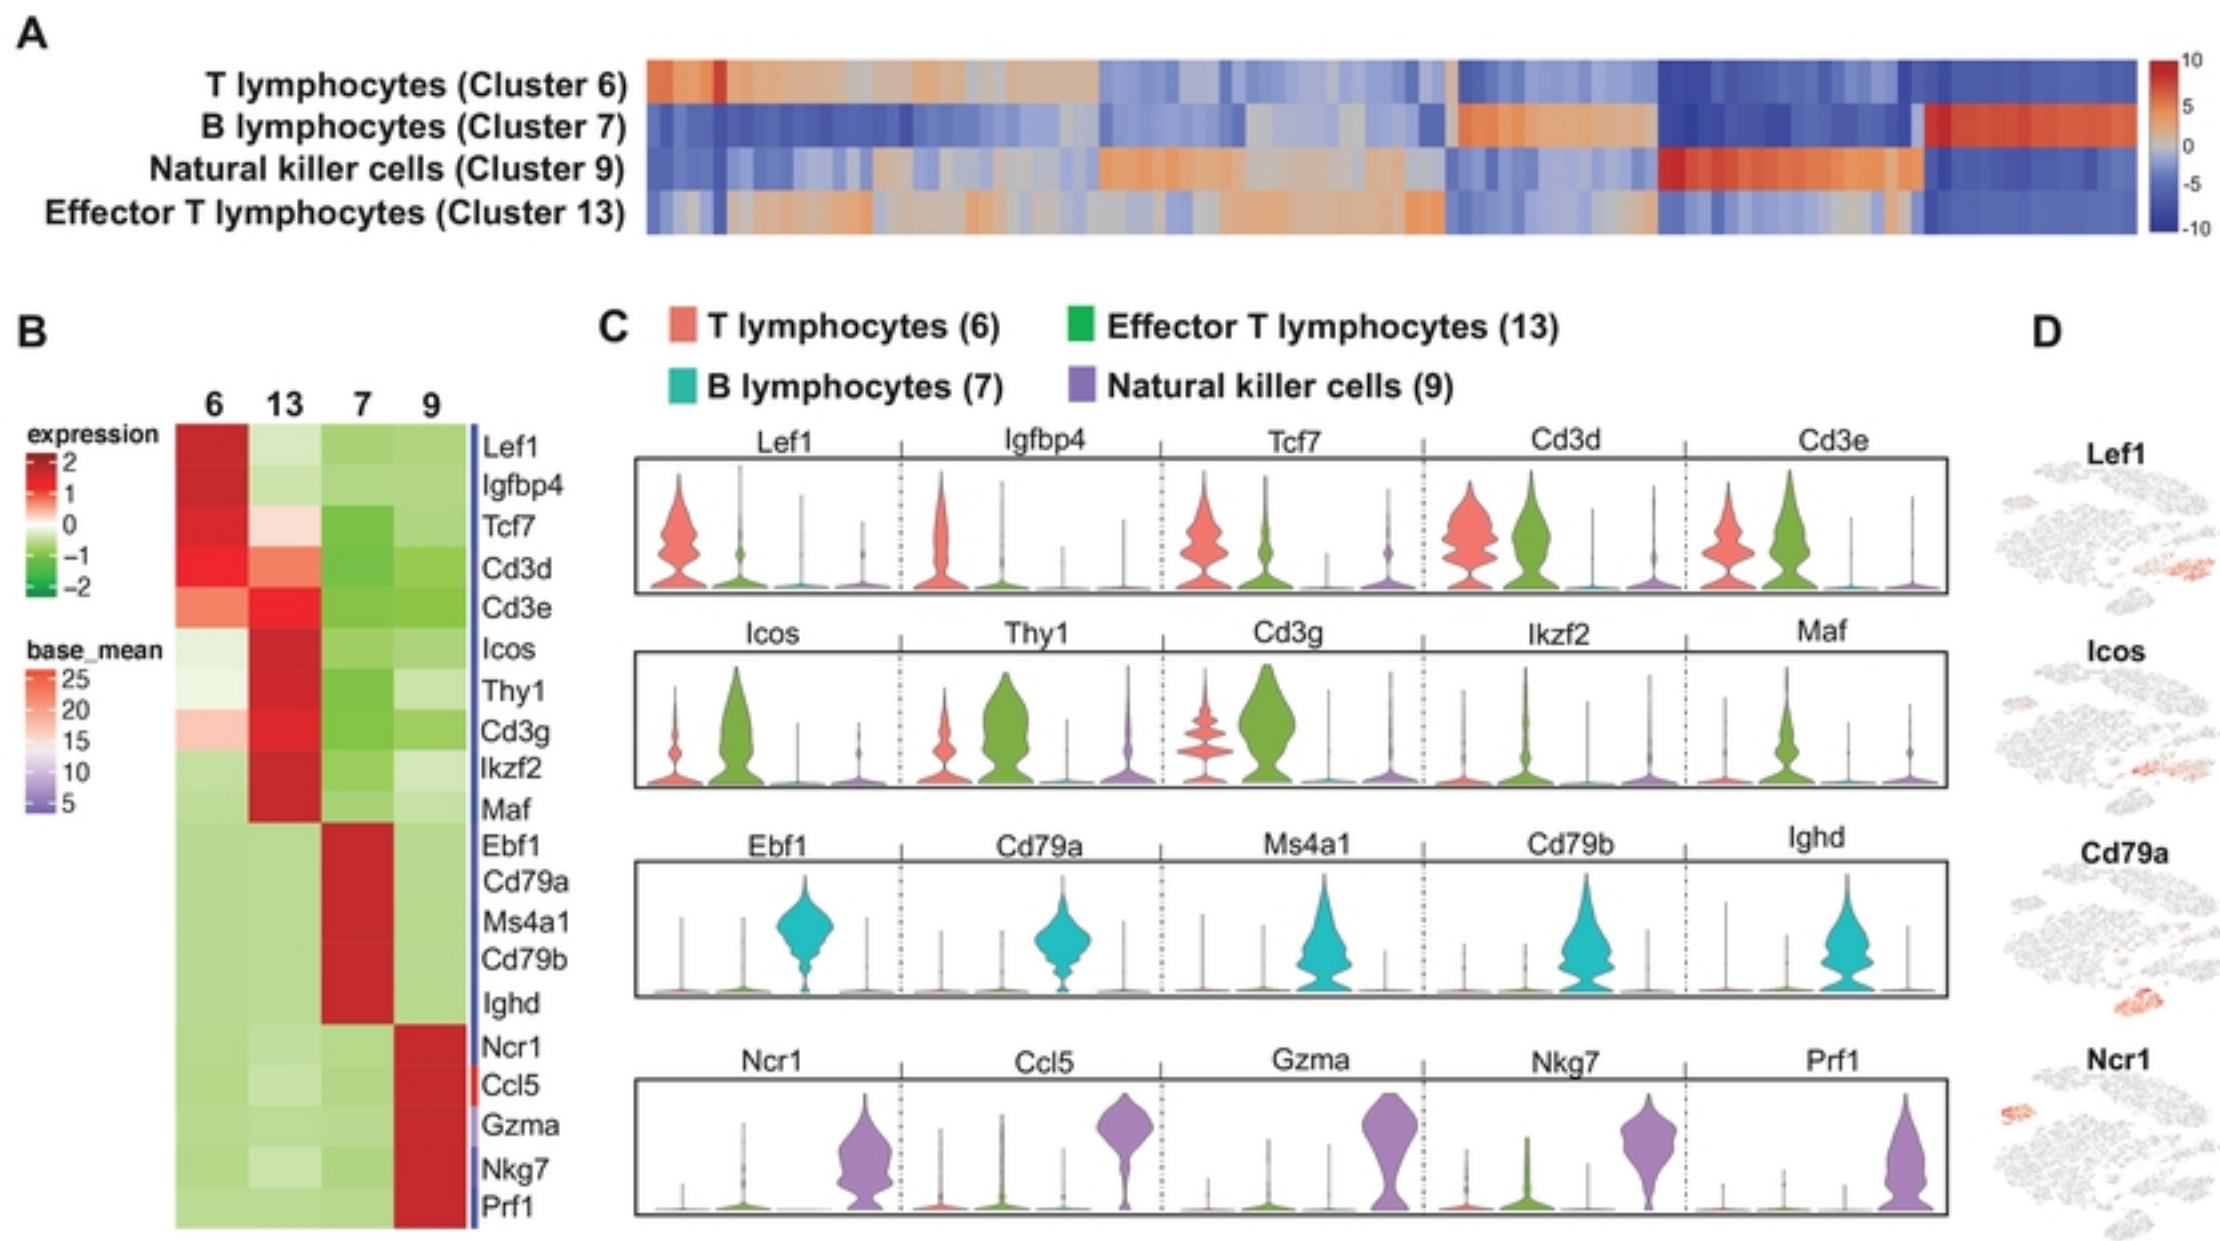

Figure 5

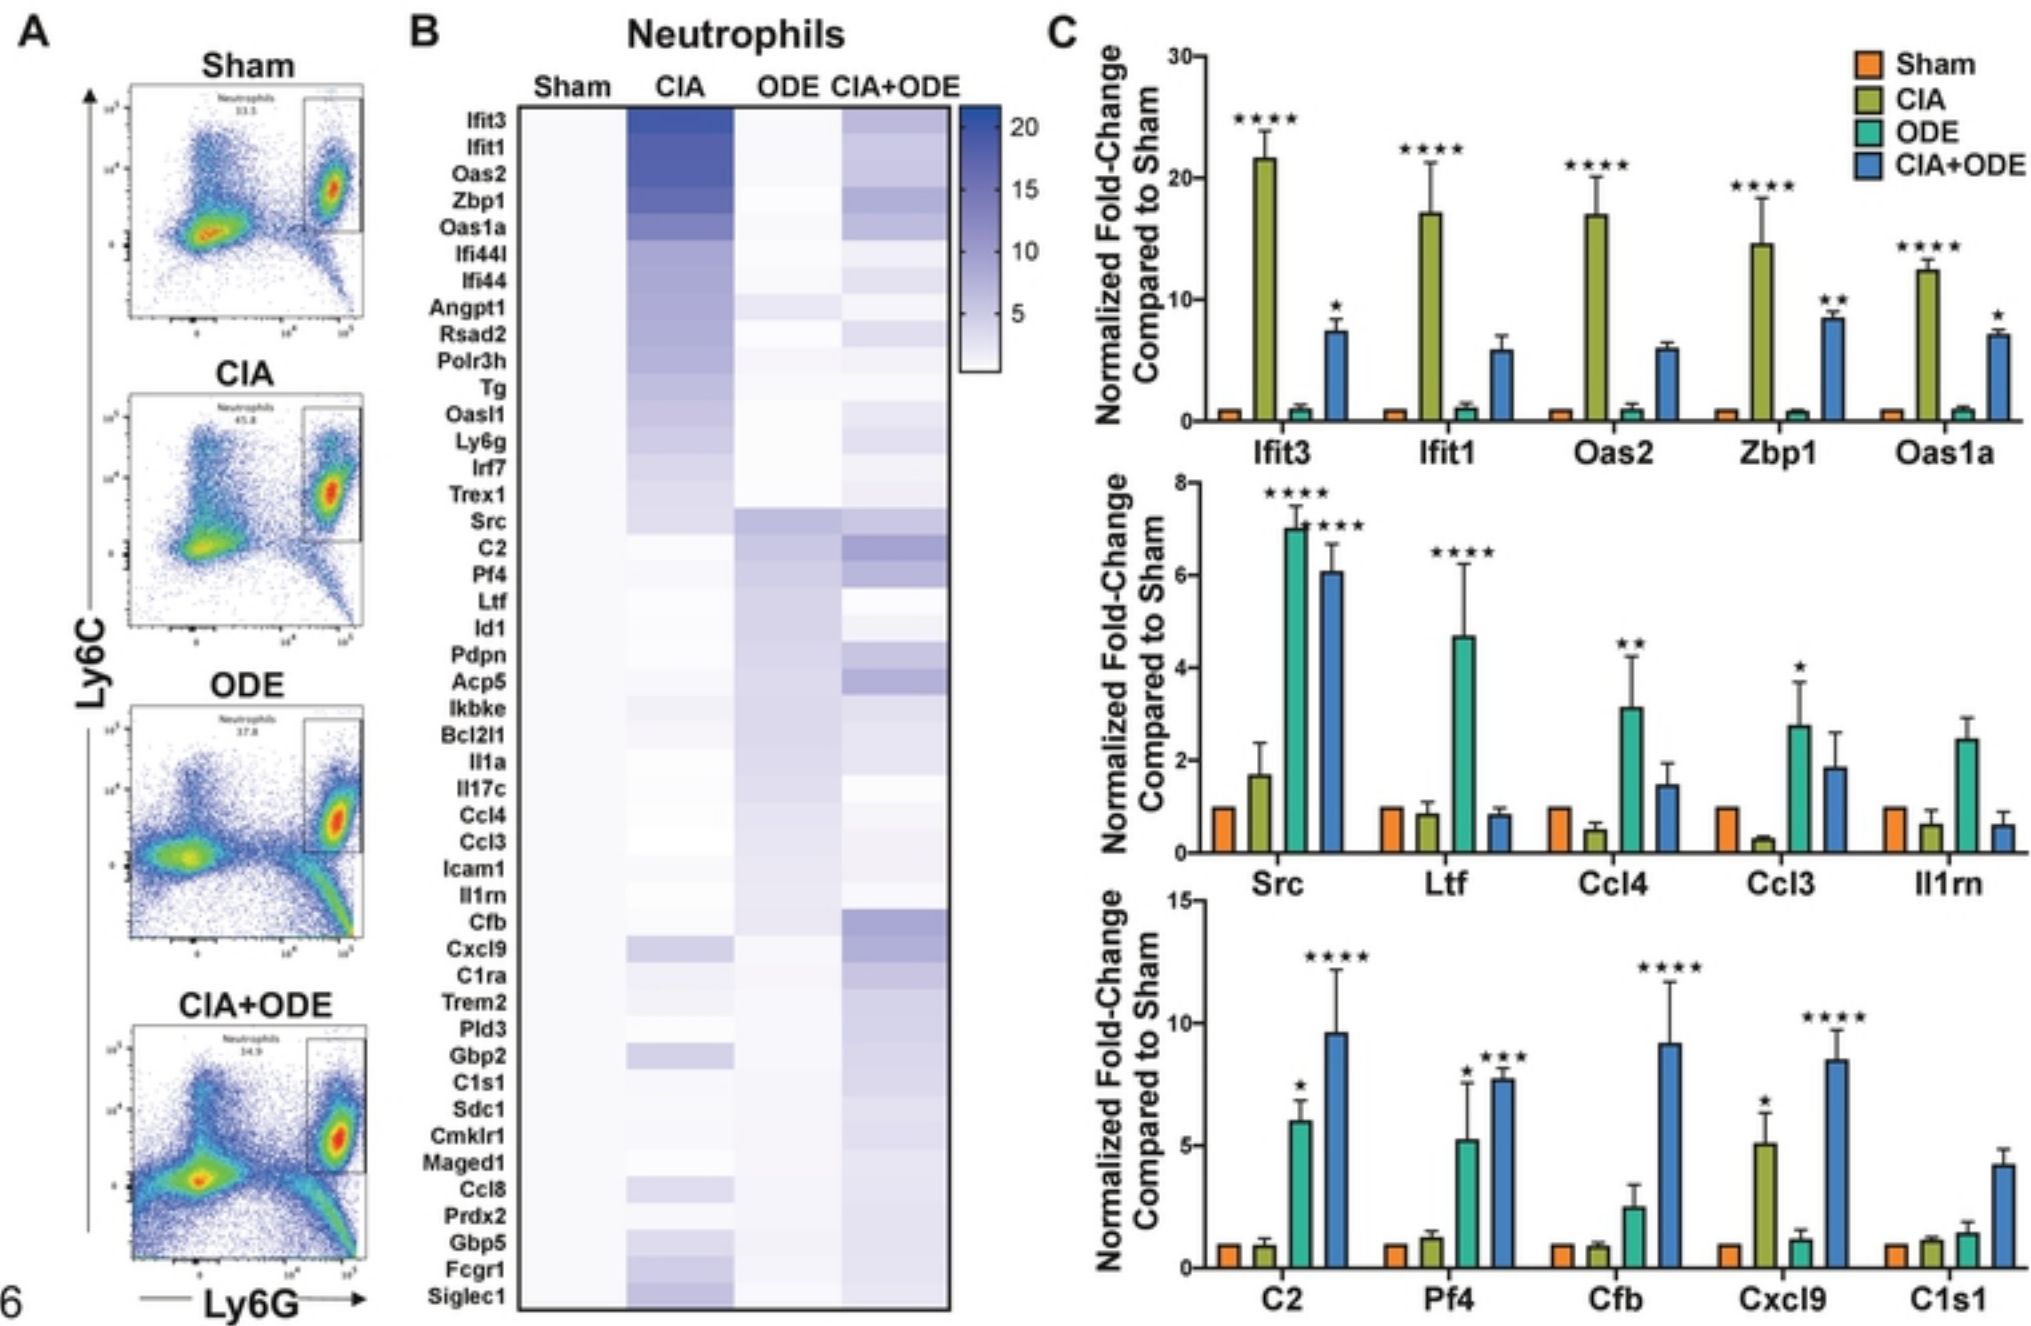

Figure 6

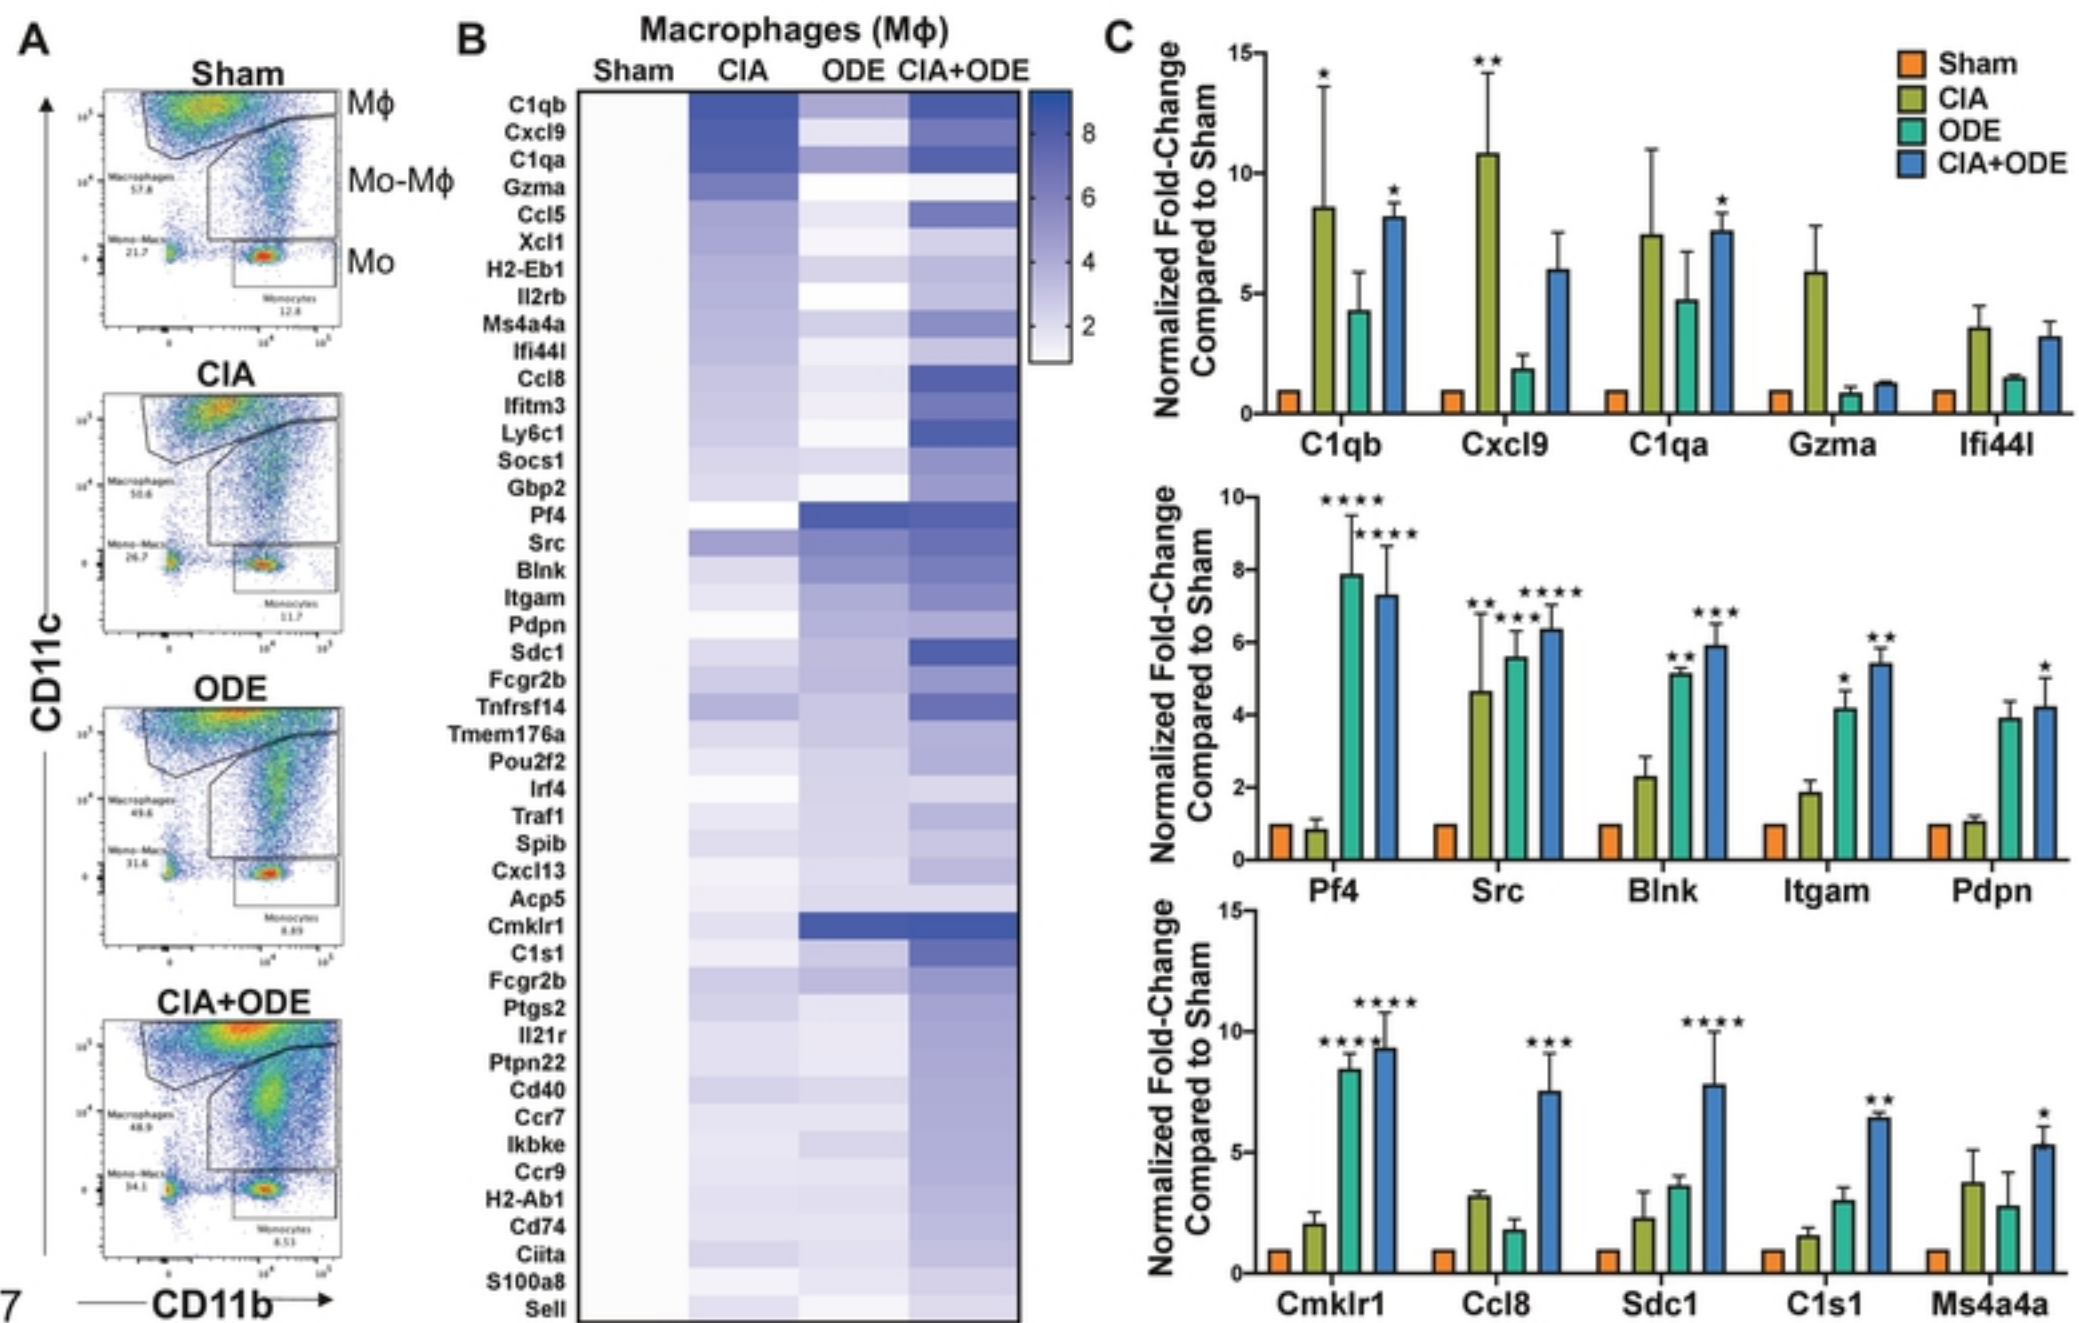

Figure 7

### A Monocytes-Macrophages (Mo-M $\phi$ )

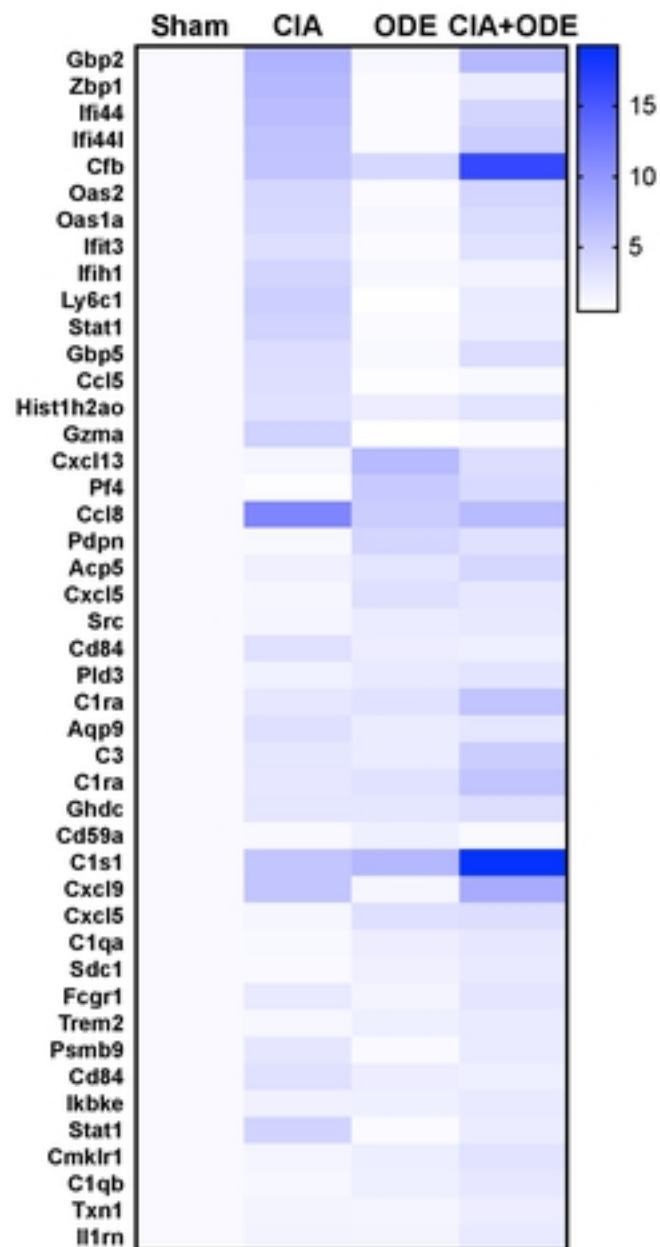

### B

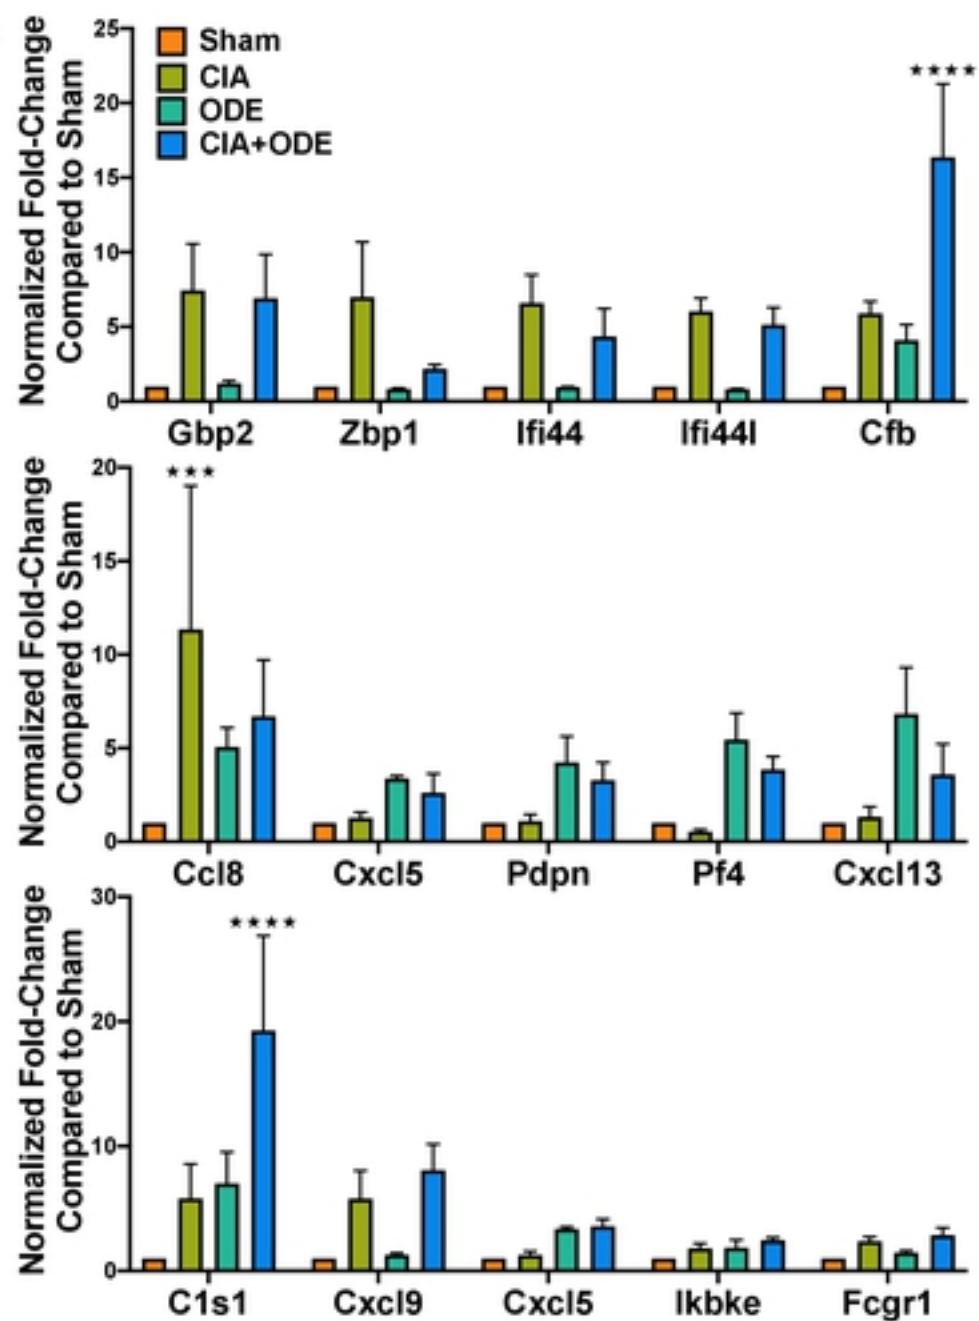

Figure 8

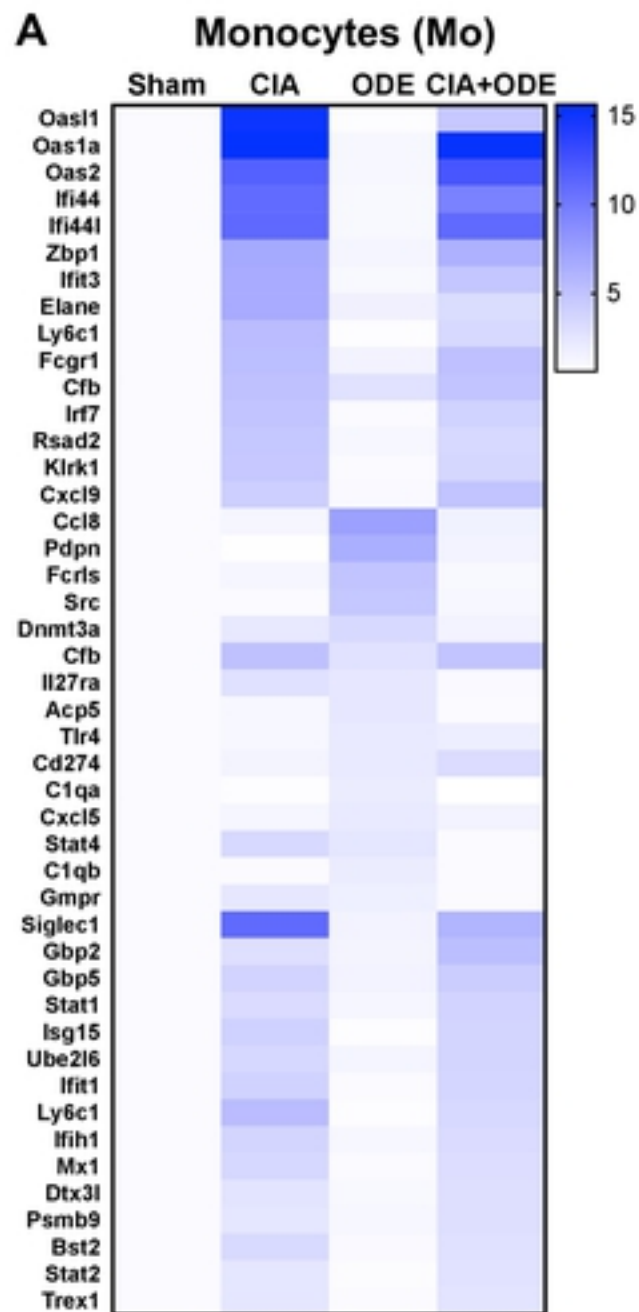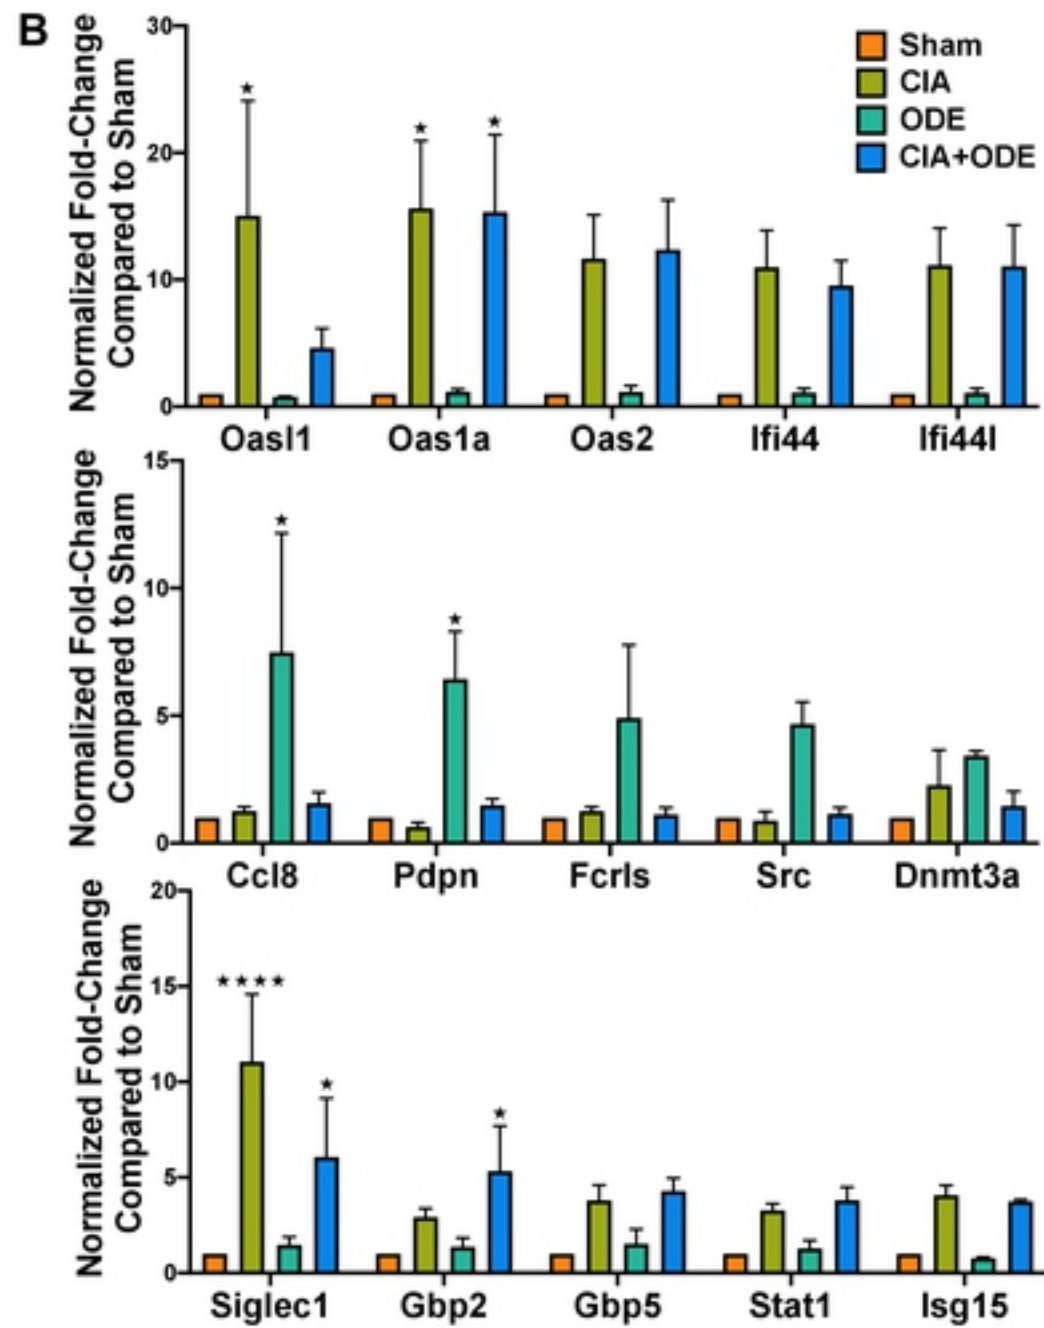

Figure 9

CD45<sup>+</sup> Ly6C<sup>+</sup> Ly6G<sup>+</sup> CD11b<sup>+</sup> SSC<sup>high</sup> gMDSCs

CD45<sup>+</sup> Ly6G<sup>-</sup> CD11b<sup>+</sup> Ly6C<sup>+</sup> SSC<sup>low</sup> mMDSCs

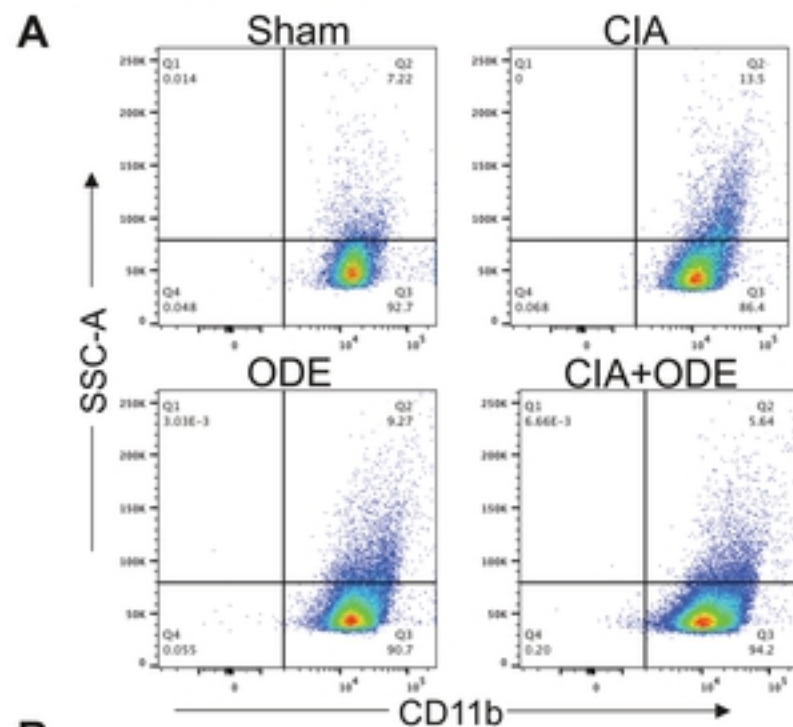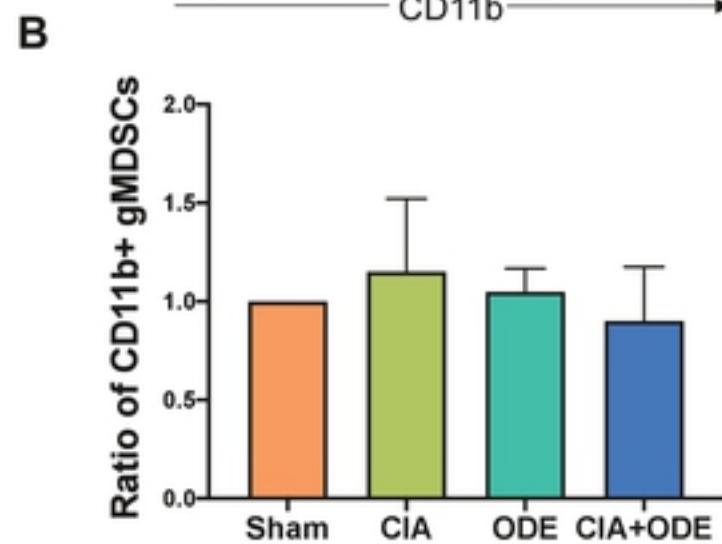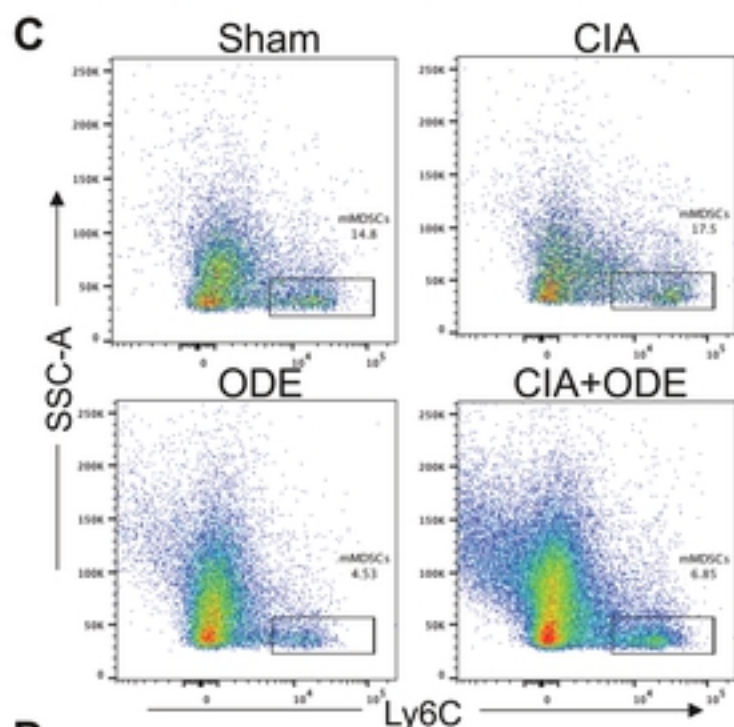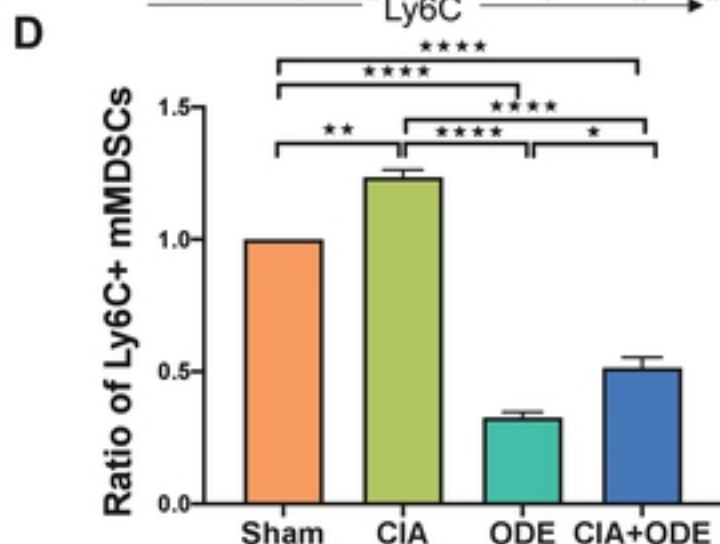

Figure 10
